# Supplementary material
Source: publisher figshare collection journal article supplement (https://gsapubs.figshare.com/ndownloader/files/28280421)
Supplement: Supplementary file 1 [file 28280421]

## Sheet: Table S1
	Table S1. Published ages of ophiolites and arc magmatism in Myanmar and Andaman
	Tectonic unit	Location	Lithology	Age (Ma)	Methods	References
	Eastern Belt Ophiolites	Myitkyina	diorite	173±2	Zircon U-Pb	C.Z. Liu et al., 2016
		Myitkyina	gabbro	173±2	Zircon U-Pb	C.Z. Liu et al., 2016
		Myitkyina	diorite	172±2	Zircon U-Pb	C.Z. Liu et al., 2016
		Myitkyina	gabbro	177±1	Zircon U-Pb	Yang et al., 2012
		Myitkyina	plagiogranite	176±12	Zircon U-Pb	Yang et al., 2012
		Myitkyina	olivine pyroxenite	171±2	Zircon U-Pb	Yang et al., 2012
		Myitkyina	basaltic andesite	166±3	Zircon U-Pb	Yang et al., 2012
	Mogok-Mergui batholiths of Sibumusu continental margin arc	Mawchi mine	granite	44.6±2.1	ZirconU-Pb	Myint et al., 2017
		Mawchi mine	granite	44.6±2.1	ZirconU-Pb	Myint et al., 2017
		Mawchi mine	granite	43.7±0.4	ZirconU-Pb	Myint et al., 2017
		Mawchi mine	granite	43.7±0.4	ZirconU-Pb	Myint et al., 2017
		Mawchi mine	granite	42.7±0.9	ZirconU-Pb	Myint et al., 2017
		Mandalay Hill	syenite	181±1	ZirconU-Pb	Barley et al., 2003
		Mandalay Hill	syenite	171±2	ZirconU-Pb	Barley et al., 2003
		Kyanigan Hills , Mogok	othogniess	170.1±1.1	ZirconU-Pb	Barley et al., 2003
		Mandalay Hill	syenite	167±2	ZirconU-Pb	Barley et al., 2003
		Yebokson	granodiorite	125.5±0.7	ZirconU-Pb	Barley et al., 2003
		Yebokson	granodiorite	123.5±0.9	ZirconU-Pb	Barley et al., 2003
		Yebokson	granodiorite	121±1	ZirconU-Pb	Barley et al., 2003
		Mandalay Hill	syenite	47.3±1.3	ZirconU-Pb	Barley et al., 2003
		Yesin Dam	syenite	46.2±1	ZirconU-Pb	Barley et al., 2003
		Kyanigan Hills , Mogok	othogniess	43.4±0.8	ZirconU-Pb	Barley et al., 2003
		Mandalay Hill	syenite	33.1±0.9	ZirconU-Pb	Barley et al., 2003
		Mandalay Hill	syenite	30.9±0.6	ZirconU-Pb	Barley et al., 2003
		Dawei	granite	75.3±7.7	ZirconU-Pb	Gardiner et al., 2016
		Dawei	granite	69.5±1	ZirconU-Pb	Gardiner et al., 2016
		Dawei	granite	62.3±0.6	ZirconU-Pb	Gardiner et al., 2016
		Kabaing	granite	46.2±0.6	ZirconU-Pb	Gardiner et al., 2016
		Kabaing	granite	45.3±0.6	ZirconU-Pb	Gardiner et al., 2016
		Wuntho	granite	99.8±1.3	ZirconU-Pb	Gardiner et al., 2017
		Wuntho	granite	98.3±1	ZirconU-Pb	Gardiner et al., 2017
		Dawei	granite	72.1±1.3	ZirconU-Pb	Gardiner et al., 2017
		Dawei	granite	68.8±1.0	ZirconU-Pb	Gardiner et al., 2017
		Dawei	granite	64.1±1.6	ZirconU-Pb	Gardiner et al., 2017
		Dawei	granite	58.7±0.6	ZirconU-Pb	Gardiner et al., 2017
		Mogok	granite	123.4±2.0	ZirconU-Pb	Gardiner et al., 2018
		Dawei	granite	75.6±8.8	ZirconU-Pb	Gardiner et al., 2018
		Mogok	granite	71.9±1.1	ZirconU-Pb	Gardiner et al., 2018
		Mogok	granite	71.1±0.6	ZirconU-Pb	Gardiner et al., 2018
		Dawei	granite	58.5±0.5	ZirconU-Pb	Gardiner et al., 2018
		Mogok	granite	55.1±0.5	ZirconU-Pb	Gardiner et al., 2018
		Dawei	granite	50.3±0.6	ZirconU-Pb	Gardiner et al., 2018
		Dawei	granite	70.5±0.8	ZirconU-Pb	Jiang et al., 2017
		Dawei	granite	68.9±1.8	ZirconU-Pb	Jiang et al., 2017
		Mogok	granite	129.8±8.2	ZirconU-Pb	Kyaw Thu 2007
		Mogok	syenite	83±4	ZirconU-Pb	Kyaw Thu 2007
		Mogok	leucogranite	44±4	ZirconU-Pb	Kyaw Thu 2007
		Bawapin	granite	62.5±1.0	ZirconU-Pb	J.X. Li et al., 2018
		Bawapin	granite	60.7±2.5	ZirconU-Pb	J.X. Li et al., 2018
		Kalonta	granite	64.6±3.9	ZirconU-Pb	J.X. Li et al., 2018
		Dawei	muscovite granite	83.9±0.5	ZirconU-Pb	J.X. Li et al., 2019a
		Dawei	two-mica granite	73.4±0.9	ZirconU-Pb	J.X. Li et al., 2019a
		Dawei	biotite granite	71.5±0.6	ZirconU-Pb	J.X. Li et al., 2019a
		Dawei	biotite granite	70.8±0.3	ZirconU-Pb	J.X. Li et al., 2019a
		Dawei	biotite granite	70.7±0.6	ZirconU-Pb	J.X. Li et al., 2019a
		Dawei	biotite granite	68.4±0.2	ZirconU-Pb	J.X. Li et al., 2019a
		Dawei	biotite granite	61±0.5	ZirconU-Pb	J.X. Li et al., 2019a
		Dawei	biotite granite	60.8±0.5	ZirconU-Pb	J.X. Li et al., 2019a
		Dawei	muscovite granite	60.6±0.3	ZirconU-Pb	J.X. Li et al., 2019a
		Dawei	biotite granite	60.5±0.2	ZirconU-Pb	J.X. Li et al., 2019a
		Dawei	biotite granite	60.4±0.3	ZirconU-Pb	J.X. Li et al., 2019a
		Dawei	biotite granite	60.4±0.2	ZirconU-Pb	J.X. Li et al., 2019a
		Dawei	biotite granite	60.3±0.2	ZirconU-Pb	J.X. Li et al., 2019a
		Dawei	biotite granite	59.8±0.3	ZirconU-Pb	J.X. Li et al., 2019a
		Dawei	biotite granite	54.5±0.3	ZirconU-Pb	J.X. Li et al., 2019a
		Dawei	biotite granite	54.3±0.2	ZirconU-Pb	J.X. Li et al., 2019a
		Dawei	biotite granite	53.3±0.4	ZirconU-Pb	J.X. Li et al., 2019a
		Dawei	enclave	52.7±0.6	ZirconU-Pb	J.X. Li et al., 2019a
		Dawei	biotite granite	52.6±0.3	ZirconU-Pb	J.X. Li et al., 2019a
		Dawei	biotite granite	52.2±0.3	ZirconU-Pb	J.X. Li et al., 2019a
		Dawei	biotite granite	47.8±0.3	ZirconU-Pb	J.X. Li et al., 2019a
		Sodon	granite	54±1	ZirconU-Pb	Lin et al., 2019
		Sodon	granite	51±1	ZirconU-Pb	Lin et al., 2019
		Sodon	granite	51±1	ZirconU-Pb	Lin et al., 2019
		Mawpalaw Taung	granite	121.3±1.1	ZirconU-Pb	Crow & Zaw, 2017
		Thanbyuzayat	dyke	106.8±1.6	ZirconU-Pb	Crow & Zaw, 2017
		Thanbyuzayat	granite	118.9±2.9	ZirconU-Pb	Paik, 2017
		Thanbyuzayat	quartz microdiorite	113.2±1.6	ZirconU-Pb	Paik, 2017
		Payangazu-Yebokson	diorite	128±1	ZirconU-Pb	Mitchell et al., 2012
		Payangazu-Yebokson	gneiss	122±2	ZirconU-Pb	Mitchell et al., 2012
		Belin-Kyaukse	augen gneiss	114±3	ZirconU-Pb	Mitchell et al., 2012
		Salinyi	diorite dike	105±2	Zircon U-Pb	Mitchell et al., 2012
		Mokpalin	quartz diorite	91±1	ZirconU-Pb	Mitchell et al., 2012
		Nattaung	granite	72±1	ZirconU-Pb	Mitchell et al., 2012
		Moulmein	foliated granite	70±1	ZirconU-Pb	Mitchell et al., 2012
		Mokpalin	granite	63±1	ZirconU-Pb	Mitchell et al., 2012
		Payangazu-Yebokson	dacite dyke	50±1	ZirconU-Pb	Mitchell et al., 2012
		Nattaung	granite	48±1	ZirconU-Pb	Mitchell et al., 2012
		Belin-Kyaukse	granite	46±1	ZirconU-Pb	Mitchell et al., 2012
		Belin-Kyaukse	granite	45±3	ZirconU-Pb	Mitchell et al., 2012
		Belin-Kyaukse	diorite	45±1	ZirconU-Pb	Mitchell et al., 2012
		Monbinzon–Taunggwa, Thazi and Pyawbwe townships	granite	181.1±1.9	ZirconU-Pb	Crow & Zaw, 2017
		Monbinzon–Taunggwa, Thazi and Pyawbwe townships	diorite	124.9±0.8	ZirconU-Pb	Crow & Zaw, 2017
		Monbinzon–Taunggwa, Thazi and Pyawbwe townships	diorite	119.2±1.7	ZirconU-Pb	Crow & Zaw, 2017
		Monbinzon–Taunggwa, Thazi and Pyawbwe townships	leucogneiss	183.2±1.9	ZirconU-Pb	Crow & Zaw, 2017
		Monbinzon–Taunggwa, Thazi and Pyawbwe townships	diorite	119±1	ZirconU-Pb	Crow & Zaw, 2017
		Monbinzon–Taunggwa, Thazi and Pyawbwe townships	leucogranite	106.9±0.6	ZirconU-Pb	Crow & Zaw, 2017
		Mandalay Hill , Mogko	granite	169.9±1.6	Monzonite U-Pb	Pickard et al., 1996
		Mandalay Hill , Mogko	granite	150.6±0.8	Monzonite U-Pb	Pickard et al., 1996
		Yebokson	granodiorite	124.9±1.4	ZirconU-Pb	Pickard et al., 1996
		Yebokson	granodiorite	118±1.7	ZirconU-Pb	Pickard et al., 1996
		Kawsong	granite	82±1.4	ZirconU-Pb	Pickard et al., 1996
		Hermyingyi	granite	61.7±0.8	ZirconU-Pb	Pickard et al., 1996
		Auk Bok	granite	52.1±0.6	ZirconU-Pb	Pickard et al., 1996
		Auk Bok	granite	49.7±0.5	ZirconU-Pb	Pickard et al., 1996
		Mandalay Hill , Mogko	granite	43.8±1.0	Monzonite U-Pb	Pickard et al., 1996
		Mawlamyine	orthogneiss	71.3±0.5	ZirconU-Pb	Roger et al., 1999
		Bilin Quarry	granite	48.5±2.5	ZirconU-Pb	Roger et al., 1999
		Yesin Dam	syenite	33.9±0.2	ZirconU-Pb	Roger et al., 1999
		Kyanigan Quarry	granite	59±1	ZirconU-Pb	Searle et al., 2007
		Kyanigan Quarry	leucogranite	31.2±0.3	ZirconU-Pb	Searle et al., 2007
		Kyanigan Quarry. Mogok	othogniess	59±1	ZirconU-Pb	Searle et al., 2007
		Kyaukse Hills	leucogranite	46.3±0.6	ZirconU-Pb	Searle et al., 2007
		Kyaukse Hills	leucogranite	40.2±0.3	ZirconU-Pb	Searle et al., 2007
		Kyaukse Hills	leucogranite	39.1±0.8	ZirconU-Pb	Searle et al., 2007
		Kyaukse Hills	leucogranite	38.1±0.3	ZirconU-Pb	Searle et al., 2007
		Tawmore Taung	granite	60.5±0.75	ZirconU-Pb	Crow & Zaw, 2017
		Tawmore Taung	granite	58.7±0.5	ZirconU-Pb	Crow & Zaw, 2017
		Nattaung Quarry	granite	71.8±0.5	ZirconU-Pb	Crow & Zaw, 2017
		Modi Taung gold mine	dyke	53.8±0.8	ZirconU-Pb	Crow & Zaw, 2017
		Modi Taung gold mine	dyke	49±1	ZirconU-Pb	Crow & Zaw, 2017
		Modi Taung gold mine	dyke	48.8±0.9	ZirconU-Pb	Crow & Zaw, 2017
	Shanganlon magmatic rocks of the Wuntho-Popa arc	Shangalon	diorite	40±2	ZirconU-Pb	Gardiner et al., 2018
		Shangalon	granite	39.6±0.2	ZirconU-Pb	Li et al., 2019b
		Shangalon	diorite	38.7±0.2	ZirconU-Pb	Li et al., 2019b
		Shangalon	dacite	38.5±0.3	ZirconU-Pb	Li et al., 2019b
		Shangalon	dacite	38.2±0.3	ZirconU-Pb	Li et al., 2019b
		Shangalon	granodiorite	38.1±0.3	ZirconU-Pb	Li et al., 2019b
		Shangalon	granodiorite	37.4±0.2	ZirconU-Pb	Li et al., 2019b
		Shangalon	granodiorite	37.3±0.2	ZirconU-Pb	Li et al., 2019b
		Shangalon	granodiorite	37.1±0.2	ZirconU-Pb	Li et al., 2019b
		Shangalon	granodiorite	36.9±0.3	ZirconU-Pb	Li et al., 2019b
		Shangalon	diorite	36.6±0.2	ZirconU-Pb	Li et al., 2019b
		Shangalon	granodiorite	36.5±0.2	ZirconU-Pb	Li et al., 2019b
		Shangalon	monzonite	31.5±0.4	ZirconU-Pb	Li et al., 2019b
	Western Belt Ophiolites	Naga-Manipur	gabbro	117.5±0.3	ZirconU-Pb	Aitchison et al., 2019
		Naga-Manipur	gabbro	116.3±0.3	ZirconU-Pb	Aitchison et al., 2019
		Kalaymayo	rodingite	127±1	Rodingite U-Pb	Liu et al., 2016
		Kalaymayo	rodingite	126±2	Rodingite U-Pb	Liu et al., 2016
		Kalaymayo	amphibolite-MORB	115±1	ZirconU-Pb	Liu et al., 2016
		Naga-Manipur	plagiogranite	118.8±1.2	ZirconU-Pb	Singh et al., 2017
		Naga-Manipur	plagiogranite	117.1±1.3	ZirconU-Pb	Singh et al., 2017
		Naga-Manipur	plagiogranite	116.4±2.2	ZirconU-Pb	Singh et al., 2017
		Kalaymayo	amphibolite-MORB	119±3	ZirconU-Pb	J. Zhang et al ., 2017
		Kalaymayo	gabbro	133±2	ZirconU-Pb	Zhang et al., 2018
		Kalaymayo	gabbro	131±2	ZirconU-Pb	Zhang et al., 2018
		Kalaymayo	gabbro	128±1	ZirconU-Pb	Zhang et al., 2018
	Andaman Ophiolites	Andaman	trondhjemite	95±2	Zircon U-Pb	Pederson et al., 2010
		Andaman	trondhjemite	95±2	ZirconU-Pb	Pederson et al., 2010
		Andaman	tonalite	94±1	Zircon U-Pb	Pederson et al., 2010
		Andaman	tonalite	94±1	ZirconU-Pb	Pederson et al., 2010
		Andaman	amphibolite, Metamorphic Soles	106.4±2.1	Ar-Ar	Plunder et al., 2020
		Andaman	amphibolite, Metamorphic Soles	105.3±1.6	Ar-Ar	Plunder et al., 2020
		Andaman	plagiogranite	93.6±1.3	Zircon U-Pb	Sarma et al., 2010
		Andaman	plagiogranite	93.6±1.3	ZirconU-Pb	Sarma et al., 2010
	Wuntho-Popa arc	Wuntho	granite	102.1±0.95	ZirconU-Pb	Gardiner et al., 2018
		Wuntho	granite	98.1±0.47	ZirconU-Pb	Gardiner et al., 2018
		Shangalon	gabbro	106.7±0.5	Zircon U-Pb	J.X. Li et al., 2020
		Shangalon	granite	104±0.6	Zircon U-Pb	J.X. Li et al., 2020
		Shangalon	granodiorite	103.2±0.4	Zircon U-Pb	J.X. Li et al., 2020
		Shangalon	granite	103±0.7	Zircon U-Pb	J.X. Li et al., 2020
		Wuntho-Banmauk	granodiorite	102.4±0.9	Zircon U-Pb	J.X. Li et al., 2020
		Wuntho-Banmauk	granodiorite	102.4±0.8	Zircon U-Pb	J.X. Li et al., 2020
		Wuntho-Banmauk	granite	101.8±0.6	Zircon U-Pb	J.X. Li et al., 2020
		Wuntho-Banmauk	granite	101.4±0.8	Zircon U-Pb	J.X. Li et al., 2020
		Shangalon	granite	101.2±0.7	Zircon U-Pb	J.X. Li et al., 2020
		Wuntho-Banmauk	granite	99.4±0.8	Zircon U-Pb	J.X. Li et al., 2020
		Wuntho-Banmauk	granite	97.1±0.5	Zircon U-Pb	J.X. Li et al., 2020
		Wuntho-Banmauk	granite	96.3±0.5	Zircon U-Pb	J.X. Li et al., 2020
		Wuntho-Banmauk	gabbro	94.7±0.5	Zircon U-Pb	J.X. Li et al., 2020
		Wuntho-Banmauk	diorite	94.6±0.9	Zircon U-Pb	J.X. Li et al., 2020
		Wuntho-Banmauk	granite	94.4±0.4	Zircon U-Pb	J.X. Li et al., 2020
		Wuntho-Banmauk	granodiorite	94.3±0.3	Zircon U-Pb	J.X. Li et al., 2020
		Wuntho-Banmauk	granodiorite	93.4±0.5	Zircon U-Pb	J.X. Li et al., 2020
		Wuntho-Banmauk	diorite	90.6±0.6	Zircon U-Pb	J.X. Li et al., 2020
		Wuntho-Banmauk	diorite	89.8±0.7	Zircon U-Pb	J.X. Li et al., 2020
		Yingchun	granite	102.7±0.8	ZirconU-Pb	Li et al., 2013
		Shanganlon south	granite	102±1	Zircon U-Pb	Li et al., 2013
		Banmauk	diorite	103±1	Zircon U-Pb	Lin et al., 2019
		Banmauk	two-mica granite	102±1	Zircon U-Pb	Lin et al., 2019
		Banmauk	granodiorite	101±1	Zircon U-Pb	Lin et al., 2019
		Banmauk	two-mica granite	98±1	Zircon U-Pb	Lin et al., 2019
		Wuntho	diorite	98±1	Zircon U-Pb	Lin et al., 2019
		Wuntho	granodiortie	97±1	Zircon U-Pb	Lin et al., 2019
		Hukawng Valley	tuff	98.8±0.6	Zircon U-Pb	Shi et al., 2012
		Wuntho-Banmauk	basaltic andesite	105.7±0.3	ZirconU-Pb	This study
		Wuntho-Banmauk	basaltic andesite	103±4	ZirconU-Pb	This study
		Salingyi	rhoylite	100.6±0.4	Zircon U-Pb	This study
		Wuntho-Banmauk	diabase dike	93.69±0.25	ZirconU-Pb	This study
		Wuntho-Banmauk	basalt	93.5±2.4	ZirconU-Pb	This study
		Wuntho-Banmauk	granitoids	97.6±0.3	Ar-Ar	Westerweel et al., 2019
		Wuntho-Banmauk	granitoids	97.3±0.6	Ar-Ar	Westerweel et al., 2019
		Wuntho-Banmauk	granitoids	96.6±0.3	Ar-Ar	Westerweel et al., 2019
		Wuntho-Banmauk	granitoids	94.7±0.4	Ar-Ar	Westerweel et al., 2019
		Wuntho-Banmauk	granitoids	90.6±0.2	Ar-Ar	Westerweel et al., 2019
		Wuntho-Banmauk	granitoids	87.3±0.5	Ar-Ar	Westerweel et al., 2019
		Wuntho-Banmauk	basalt	100.9±0.2	Ar-Ar	Westerweel et al., 2019
		Wuntho-Banmauk	basalt	91.2±0.2	Ar-Ar	Westerweel et al., 2019
		Wuntho-Banmauk	basalt	85.0±0.2	Ar-Ar	Westerweel et al., 2019
		Shanganlon	granite	94.6±1.0	Zircon U-Pb	Zaw, 1990
		Yingchun	granite	106.2±1.0	ZirconU-Pb	P. Zhang et al., 2017
		Yingchun	granite	103.5±0.9	ZirconU-Pb	P. Zhang et al., 2018
		Yingchun	trachybasalt	69.0±2.6	ZirconU-Pb	P. Zhang et al., 2019
		Yingchun	granite	64.6±1.0	ZirconU-Pb	P. Zhang et al., 2017
	References:
	Aitchison, J. C., Ao, A., Bhowmik, S., Clarke, G. L., Ireland, T. R., Kachovich, S., Lokho, K., Stojanovic, D., Roeder, T., Truscott, N., Zhen, Y., Zhou, R.J., 2019, Tectonic evolution of the western margin of the Burma microplate based on new fossil and radiometric age constraints: Tectonics, v. 38, p. 1718–1741, http://doi:10.1029/2018tc005049
	Barley, M. E., Pickard, A. L., Zaw, K., Rak, P., and Doyle, M. G., 2003, Jurassic to Miocene magmatism and metamorphism in the Mogok metamorphic belt and the India-Eurasia collision in Myanmar. Tectonics, v. 22, no.3, http://doi:10.1029/2002tc001398.
	Crow, M. J., and Khin, Z., 2017, Geochronology in Myanmar (1964–2017). Geological Society, London, Memoirs, v. 48, p. 713–759, http://doi:10.1144/m48.32
	Gardiner, N. J., Hawkesworth, C. J., Robb, L. J., Whitehouse, M. J., Roberts, N. M. W., Kirkland, C. L., and Evans, N. J., 2017, Contrasting Granite Metallogeny through the Zircon Record: A Case Study from Myanmar: Scientific Reports, v. 7, no. 1, 748, http://doi:10.1038/s41598-017-00832-2
	Gardiner, N. J., Searle, M. P., Morley, C. K., Robb, L. J., Whitehouse, M. J., Roberts, N. M. W., Kirkland, C.L., Spencer, C.J., 2018, The crustal architecture of Myanmar imaged through zircon U-Pb, Lu-Hf and O isotopes: Tectonic and metallogenic implications: Gondwana Research, v. 62, p. 27–60, http://doi:10.1016/j.gr.2018.02.008
	Gardiner, N. J., Searle, M. P., Morley, C. K., Whitehouse, M. P., Spencer, C. J., and Robb, L. J., 2016, The closure of Palaeo-Tethys in Eastern Myanmar and Northern Thailand: New insights from zircon U-Pb and Hf isotope data: Gondwana Research, v. 39, p. 401–422, http://doi:10.1016/j.gr.2015.03.001
	Jiang, H., Li, W. Q., Jiang, S. Y., Wang, H., and Wei, X. P., 2017, Geochronological, geochemical and Sr-Nd-Hf isotopic constraints on the petrogenesis of Late Cretaceous A-type granites from the Sibumasu Block, Southern Myanmar, SE Asia: Lithos, v. 268, p. 32–47, http://doi:10.1016/j.lithos.2016.11.005
	Kyaw Thu., 2007, The igneous rocks of the Mogok Stone Tract: their distribution, petrography, petrochemistry, sequence, geochronology and economic geology. Ph.D. thesis, University of Yangon, Myanmar,
	Li, J.-X., Zhang, L.-Y., Fan, W.-M., Ding, L., Sun, Y.-L., Peng, T.-P., Li, G.-M., Sein, K., 2018, Mesozoic-Cenozoic tectonic evolution and metallogeny in Myanmar: Evidence from zircon/cassiterite U-Pb and molybdenite Re-Os geochronology: Ore Geology Reviews, v. 102, p. 829–845, https://doi.org/10.1016/j.oregeorev.2018.10.009
	Li, J.-X., Fan, W.-M., Zhang, L.-Y., Evans, N. J., Sun, Y.-L., Ding, L., Guan, Q.-Y., Peng, T.-P., Cai, F.-L., Sein, K., 2019a, Geochronology, geochemistry and Sr–Nd–Hf isotopic compositions of Late Cretaceous–Eocene granites in southern Myanmar: Petrogenetic, tectonic and metallogenic implications: Ore geology reviews, v. 112, http://doi:10.1016/j.oregeorev.2019.103031
	Li, J.-X., Zhang, L.-Y., Fan, W.-M., Ding, L., Sun, Y.-L., Peng, T.-P., Cai, F.L., Guan, Q.Y., Sein, K., 2019b, Subduction of Indian continental lithosphere constrained by Eocene-Oligocene magmatism in northern Myanmar: Lithos, v. 348–349, https://doi: 10.1016/j.lithos.2019.105211
	Li, J.-X., Fan, W.-M., Zhang, L.-Y., Peng, T.-P., Sun, Y.-L., Ding, L., Cai, F.L., Sein, K., 2020, Prolonged Neo-Tethyan magmatic arc in Myanmar: evidence from geochemistry and Sr–Nd–Hf isotopes of Cretaceous mafic–felsic intrusions in the Banmauk–Kawlin area: International Journal of Earth Sciences, v. 109, p. 649–668, http://doi:10.1007/s00531-020-01824-w
	Li, R. Y., Mei, L. F., Zhu, G. H., Zhao, R. M., Xu, X. M., Zhao, H. X., Zhang, P., Yin, Y. P., and Ma, Y. X., 2013, Late Mesozoic to Cenozoic Tectonic Events in Volcanic Arc, West Burma Block: Evidences from U-Pb Zircon Dating and Apatite Fission Track Data of Granitoids: Journal of Earth Science, v. 24, no. 4, p. 553-568, http://doi.10.1007/s12583-013-0349-7
	Lin, T.-H., Mitchell, A. H. G., Chung, S.-L., Tan, X.-B., Tang, J.-T., Oo, T., and Wu, F.-Y., 2019, Two parallel magmatic belts with contrasting isotopic characteristics from southern Tibet to Myanmar: zircon U–Pb and Hf isotopic constraints: Journal of the Geological Society, v. 176, p. 574–587, http://doi:10.1144/jgs2018-072
	Liu, C.-Z., Chung, S.-L., Wu, F.-Y., Zhang, C., Xu, Y., Wang, J.-G., Chen, Y., Guo, S., 2016, Tethyan suturing in Southeast Asia: Zircon U-Pb and Hf-O isotopic constraints from Myanmar ophiolites: Geology, v. 44, p. 311–314, http://doi:10.1130/g37342.1
	Paik,M., 2017, Geochemistry and geochronology of granitoid rocks in the Mawpalaw Taung area, Thanbyuzayat Township, southern Myanmar: their petrogenesis and tectonic setting, in: Barber, A.A.J., Khin Z., Crow, M.J., editors, Myanmar: Geology, Resources and Tectonics, Geological Society, London, Memoirs 48, p. 401–412, http://doi: 10.1144/M48.18
	Pedersen, R. B., Searle, M. P., Carter, A., and Bandopadhyay, P. C., 2010, U-Pb zircon age of the Andaman ophiolite: implications for the beginning of subduction beneath the Andaman-Sumatra arc: Journal of the Geological Society, v. 167, p. 1105–1112, http://doi:10.1144/0016-76492009-151
	Plunder, A., Bandyopadhyay, D., Ganerød, M., Advokaat, E. L., Ghosh, B., Bandopadhyay, P., and Hinsbergen, D. J. J., 2020, History of subduction polarity reversal during arc‐continent collision: constraints from the Andaman Ophiolite and its metamorphic sole: Tectonics, http://doi:10.1029/2019tc005762
	Mitchell, A., Chung, S.-L., Oo, T., Lin, T.-H., and Hung, C.-H., 2012, Zircon U–Pb ages in Myanmar: Magmatic-metamorphic events and the closure of a neo-Tethys ocean?: Journal of Asian Earth Sciences, v. 56, p. 1–23, http://doi:10.1016/j.jseaes.2012.04.019
	Myint, A. Z., Zaw, K., Ye, M. S., Yonezu, K., Yue, C., Manaka, T., and Watanabe, K., 2017, Geochemistry and geochronology of granites hosting the Mawchi Sn–W deposit, Myanmar: implications for tectonic setting and emplacement, in: Barber, A. J., Khin Zaw and Crow, M.J. editors, Myanmar: Geology, Resources and Tectonics, Geological Society London Memoirs 48, p. 385–400
	Roger, F., Scharer, U., Bergman, B.S., Tapponnier, P., Lacassin, R., LeLoup, H., and Replumaz, E, A., 1999, Emplacement ages of subduc- tion and collision-related granitic magmas along the Shan Escarpment, Central Burma. European Geosciences Union, v. 4, Session A02:4A.
	Sarma, D. S., Jafri, S. H., Fletcher, I. R., and McNaughton, N. J., 2010, Constraints on the tectonic setting of the Andaman ophiolites, Bay of Bengal, India, from SHRIMP U-Pb zircon geochronology of plagiogranite: The Journal of Geology, v. 118, p. 691–697, http://doi:10.1086/656354
	Searle, M. P., Noble, S. R., Cottle, J. M., Waters, D. J., Mitchell, A. H. G., Hlaing, T., and Horstwood, M. S. A., 2007, Tectonic evolution of the Mogok metamorphic belt, Burma (Myanmar) constrained by U-Th-Pb dating of metamorphic and magmatic rocks: Tectonics, v. 26, no. 3, http:// doi:10.1029/2006TC002083
	Shi, G. H., Grimaldi, D. A., Harlow, G. E., Wang, J., Wang, J., Yang, M. C., Lei, W. Y., Li, Q. L., and Li, X. H., 2012, Age constraint on Burmese amber based on U-Pb dating of zircons: Cretaceous Research, v. 37, p. 155-163, http://doi.10.1016/j.cretres.2012.03.014
	Singh, A. K., Chung, S. L., Bikramaditya, R. K., and Lee, H. Y., 2017, New U-Pb zircon ages of plagiogranites from the Nagaland-Manipur Ophiolites, Indo-Myanmar Orogenic Belt, NE India: Journal of the Geological Society, v. 174, p. 170–179. http://doi:10.1144/jgs2016-048
	Traynor, J., Eskine, T., Khin Zaw, Large R., Makoundi, C. and Knight, J., 2015, Geology and mineralization characteristics of the Modi Taung orogenic gold deposit, Central Myanmar. Poster presented at the SEG 2015 Society of Economic Geologists Annual Meeting, Hobart, Australia.
	Westerweel, J., Roperch, P., Licht, A., Dupont-Nivet, G., Win, Z., Poblete, F., Ruffet, G., Swe, H.H., Thi, M.K., Aung, D.W., 2019, Burma Terrane part of the Trans-Tethyan arc during collision with India according to palaeomagnetic data: Nature Geoscience, v. 12, p. 863–868, http:// doi:10.1038/s41561-019-0443-2
	Yang, J. S., Xu, Z. Q., Duan, X. D., Li, J., Xiong, F. H., Liu, Z., Cai, Z.H., Li, H.Q., 2012, Discovery of a Jurassic SSZ ophiolite in the Myitkyina region of Myanmar: Acta Petrologica Sinica, v. 28, p. 1710–1730.
	Zaw, K., 1990, Geological, petrogical and geochemical characteristics of granitoid rocks in Burma: with special reference to the associated W-Sn mineralization and their tectonic setting: Journal of Southeast Asian Earth Sciences, v. 4, p. 293–335, http://doi:10.1016/0743-9547(90)90004-w
	Zhang, C., Liu, C. Z., Xu, Y., Ji, W. B., Wang, J. M., Wu, F. Y., Liu, T., Zhang, Z.Y., Zhang, W.Q., 2019, Subduction re-initiation at dying ridge of Neo-Tethys: Insights from mafic and metamafic rocks in Lhaze ophiolitic melange, Yarlung-Tsangbo Suture Zone: Earth and Planetary Science Letters, v. 523, http:// doi:10.1016/j.epsl.2019.07.009
	Zhang, J. E., Xiao, W. J., Windley, B., Cai, F. L., Sein, K., and Naing, S., 2017, Early Cretaceous wedge extrusion in the Indo-Burma Range accretionary complex: implications for the Mesozoic subduction of Neotethys in SE Asia: International Journal of Earth Sciences, v. 106, p.1391–1408, http://doi:10.1007/s00531-017-1468-7
	Zhang, J. E., Xiao, W., Windley, B. F., Wakabayashi, J., Cai, F., Sein, K., Wu, H., Naing, S., 2018, Multiple alternating forearc- and backarc-ward migration of magmatism in the Indo-Myanmar Orogenic Belt since the Jurassic: Documentation of the orogenic architecture of eastern Neotethys in SE Asia: Earth-Science Reviews, v. 185, p, 704–731, http://doi:10.1016/j.earscirev.2018.07.009
	Zhang, P., Mei, L. F., Hu, X. L., Li, R. Y., Wu, L. L., Zhou, Z. C., and Qiu, H. N., 2017, Structures, uplift, and magmatism of the Western Myanmar Arc: Constraints to mid-Cretaceous-Paleogene tectonic evolution of the western Myanmar continental margin: Gondwana Research, v. 52, p. 18–38, http://doi:10.1016/j.gr.2017.09.002

## Sheet: Table S2
Table S2. Zircon U-Pb geochronological data for the mid-Cretaceous Mawgyi Volcanics in the Wuntho-Popa arc of Myanmar
	MEASURED RATIOS									UNCORRECTED AGES (Ma)									CORRECTED RATIOS									CORRECTED AGES (Ma)
Analysis	207Pb/206Pb		207Pb/235U		206Pb/238U		208Pb/232Th		238U/232Th	207Pb/206Pb		207Pb/235U		206Pb/238U		208Pb/232Th			207Pb/206Pb		207Pb/235U		206Pb/238U		208Pb/232Th			207Pb/206Pb		207Pb/235U		206Pb/238U		208Pb/232Th
		1s		1s		1s		1s			1s		1s		1s		1s			1s		1s		1s		1s			1s		1s		1s		1s
15M109C-01	0.05382	0.00301	0.12544	0.00679	0.0169	0.00022	0.00573	0.00016	1.70986	364	99	120	6	108	1	115	3		0.04841	0.00317	0.11204	0.0072	0.01678	0.00022	0.00532	8e-05		120	147	108	7	107	1	107	2
15M109C-02	0.04776	0.00476	0.11024	0.01074	0.01674	0.00035	0.00542	0.00024	1.69474	87	177	106	10	107	2	109	5		0.04776	0.00476	0.11024	0.01074	0.01674	0.00035	0.00542	0.00024		87	177	106	10	107	2	109	5
15M109C-03	0.05064	0.00643	0.11668	0.0145	0.01671	0.00045	0.00506	0.00028	1.38612	224	230	112	13	107	3	102	6		0.05064	0.00643	0.11668	0.0145	0.01671	0.00045	0.00506	0.00028		224	230	112	13	107	3	102	6
15M109C-04	0.05868	0.00363	0.13545	0.00811	0.01673	0.00024	0.00583	0.00016	1.41866	555	106	129	7	107	2	117	3		0.04907	0.00386	0.11179	0.00866	0.01652	0.00024	0.00523	8e-05		151	178	108	8	106	1	105	2
15M109C-05	0.04767	0.00268	0.10845	0.00595	0.01649	0.00019	0.00551	0.00012	1.59555	83	100	105	5	105	1	111	2		0.04767	0.00268	0.10845	0.00595	0.01649	0.00019	0.00551	0.00012		83	100	105	5	105	1	111	2
15M109C-06	0.04756	0.00254	0.1081	0.00561	0.01648	0.00019	0.0052	0.00011	1.43935	77	93	104	5	105	1	105	2		0.04756	0.00254	0.1081	0.00561	0.01648	0.00019	0.0052	0.00011		77	93	104	5	105	1	105	2
15M109C-07	0.0511	0.00298	0.11633	0.00659	0.0165	0.00022	0.00472	0.00013	1.63259	245	106	112	6	105	1	95	3		0.0511	0.00298	0.11633	0.00659	0.0165	0.00022	0.00472	0.00013		245	106	112	6	105	1	95	3
15M109C-08	0.04791	0.00388	0.11114	0.0088	0.01682	0.00027	0.00494	0.00015	1.23334	95	145	107	8	108	2	100	3		0.04791	0.00388	0.11114	0.0088	0.01682	0.00027	0.00494	0.00015		95	145	107	8	108	2	100	3
15M109C-09	0.0492	0.00529	0.11286	0.012	0.01663	0.00026	0.00521	0.00019	1.59003	157	210	109	11	106	2	105	4		0.0492	0.00529	0.11286	0.012	0.01663	0.00026	0.00521	0.00019		157	210	109	11	106	2	105	4
15M109C-10	0.05291	0.00542	0.12097	0.01211	0.01658	0.00037	0.00498	0.00021	1.24572	325	185	116	11	106	2	100	4		0.05291	0.00542	0.12097	0.01211	0.01658	0.00037	0.00498	0.00021		325	185	116	11	106	2	100	4
15M109C-11	0.04809	0.0024	0.11139	0.00539	0.01679	0.00018	0.00529	0.0001	1.49133	104	88	107	5	107	1	107	2		0.04809	0.0024	0.11139	0.00539	0.01679	0.00018	0.00529	0.0001		104	88	107	5	107	1	107	2
15M109C-12	0.04798	0.0032	0.10907	0.00716	0.01648	0.00018	0.00447	0.00011	1.68924	98	125	105	7	105	1	90	2		0.04798	0.0032	0.10907	0.00716	0.01648	0.00018	0.00447	0.00011		98	125	105	7	105	1	90	2
15M109C-13	0.0492	0.00266	0.11184	0.00583	0.01648	0.00022	0.00573	0.00015	1.47604	157	94	108	5	105	1	115	3		0.0492	0.00266	0.11184	0.00583	0.01648	0.00022	0.00573	0.00015		157	94	108	5	105	1	115	3
15M109C-14	0.04777	0.00778	0.10876	0.01756	0.01651	0.00036	0.00471	0.00031	1.88653	88	273	105	16	106	2	95	6		0.04777	0.00778	0.10876	0.01756	0.01651	0.00036	0.00471	0.00031		88	273	105	16	106	2	95	6
15M109C-15	0.04805	0.00338	0.10743	0.00736	0.01621	0.00024	0.00481	0.00016	1.76066	102	125	104	7	104	2	97	3		0.04805	0.00338	0.10743	0.00736	0.01621	0.00024	0.00481	0.00016		102	125	104	7	104	2	97	3
15M109C-16	0.04922	0.00642	0.11043	0.01427	0.01627	0.00029	0.00496	0.0002	1.78661	158	252	106	13	104	2	100	4		0.04922	0.00642	0.11043	0.01427	0.01627	0.00029	0.00496	0.0002		158	252	106	13	104	2	100	4
15M109C-17	0.04841	0.00443	0.10822	0.00979	0.01621	0.00021	0.00428	0.00012	1.2424	119	178	104	9	104	1	86	2		0.04841	0.00443	0.10822	0.00979	0.01621	0.00021	0.00428	0.00012		119	178	104	9	104	1	86	2
15M114A-01	0.06507	0.00871	0.14426	0.01886	0.01608	0.00047	0.0057	0.00031	1.47505	777	231	137	17	103	3	115	6		0.05326	0.00883	0.1163	0.01899	0.01584	0.00046	0.00496	0.00016		340	343	112	17	101	3	100	3
15M114A-02	0.04773	0.01295	0.11214	0.02994	0.01704	0.00084	0.00549	0.00059	1.63434	86	386	108	27	109	5	111	12		0.04773	0.01295	0.11214	0.02994	0.01704	0.00084	0.00549	0.00059		86	386	108	27	109	5	111	12
15M114A-03	0.04748	0.006	0.1073	0.0133	0.01639	0.0004	0.00539	0.00027	1.54573	73	223	103	12	105	3	109	5		0.04748	0.006	0.1073	0.0133	0.01639	0.0004	0.00539	0.00027		73	223	103	12	105	3	109	5
15M114A-04	0.05072	0.00312	0.10919	0.00654	0.01562	0.0002	0.0051	0.00014	1.90337	228	114	105	6	100	1	103	3		0.05072	0.00312	0.10919	0.00654	0.01562	0.0002	0.0051	0.00014		228	114	105	6	100	1	103	3
15M114A-05	0.05027	0.00262	0.11943	0.00605	0.01723	0.0002	0.00517	0.00012	1.61829	207	96	115	5	110	1	104	2		0.05027	0.00262	0.11943	0.00605	0.01723	0.0002	0.00517	0.00012		207	96	115	5	110	1	104	2
15M114A-06	0.04691	0.00317	0.09976	0.00657	0.01543	0.00022	0.00462	0.00013	1.42714	45	117	97	6	99	1	93	3		0.04691	0.00317	0.09976	0.00657	0.01543	0.00022	0.00462	0.00013		45	117	97	6	99	1	93	3
15M114A-07	0.05694	0.00272	0.12675	0.00584	0.01615	0.00018	0.00516	0.0001	1.38113	489	82	121	5	103	1	104	2		0.05694	0.00272	0.12675	0.00584	0.01615	0.00018	0.00516	0.0001		489	82	121	5	103	1	104	2
15M114A-08	0.05469	0.00339	0.40695	0.0245	0.05397	0.00081	0.01578	0.00037	0.920599	400	108	347	18	339	5	316	7		0.05469	0.00339	0.40695	0.0245	0.05397	0.00081	0.01578	0.00037		400	108	347	18	339	5	316	7
15M114A-09	0.13247	0.00168	6.70535	0.06363	0.36714	0.00248	0.08846	0.00092	3.01474	2131	8	2073	8	2016	12	1713	17		0.13247	0.00168	6.70535	0.06363	0.36714	0.00248	0.08846	0.00092		2131	8	2073	8	2016	12	1713	17
15M114A-10	0.1196	0.00185	5.76455	0.07458	0.34962	0.00268	0.10204	0.00215	6.92299	1950	13	1941	11	1933	13	1964	39		0.1196	0.00185	5.76455	0.07458	0.34962	0.00268	0.10204	0.00215		1950	13	1941	11	1933	13	1964	39
15M114A-11	0.14017	0.00175	7.18878	0.06589	0.37199	0.00249	0.10097	0.00075	1.60996	2229	8	2135	8	2039	12	1944	14		0.14017	0.00175	7.18878	0.06589	0.37199	0.00249	0.10097	0.00075		2229	8	2135	8	2039	12	1944	14
15M114A-12	0.06892	0.00192	1.36197	0.03549	0.14334	0.00136	0.04566	0.00126	5.17102	896	38	873	15	864	8	902	24		0.06892	0.00192	1.36197	0.03549	0.14334	0.00136	0.04566	0.00126		896	38	873	15	864	8	902	24
15M114A-13	0.05962	0.00264	0.59994	0.02547	0.07299	0.00089	0.02133	0.00057	2.05789	590	71	477	16	454	5	427	11		0.05962	0.00264	0.59994	0.02547	0.07299	0.00089	0.02133	0.00057		590	71	477	16	454	5	427	11
15M116-01	0.05223	0.00287	0.10626	0.00566	0.01476	0.00018	0.00532	0.00012	1.6251	295	100	103	5	94	1	107	2		0.05223	0.00287	0.10626	0.00566	0.01476	0.00018	0.00532	0.00012		295	100	103	5	94	1	107	2
15M116-02	0.04793	0.00267	0.09837	0.00532	0.01488	0.00018	0.00467	0.00013	2.10336	96	98	95	5	95	1	94	3		0.04793	0.00267	0.09837	0.00532	0.01488	0.00018	0.00467	0.00013		96	98	95	5	95	1	94	3
15M116-03	0.04774	0.00185	0.09816	0.00364	0.01491	0.00014	0.00465	7e-05	1.38637	86	67	95	3	95.4	0.9	94	1		0.04774	0.00185	0.09816	0.00364	0.01491	0.00014	0.00465	7e-05		86	67	95	3	95.4	0.9	94	1
15M116-04	0.04769	0.00329	0.09955	0.0067	0.01514	0.00021	0.00487	0.00016	1.91248	84	123	96	6	97	1	98	3		0.04769	0.00329	0.09955	0.0067	0.01514	0.00021	0.00487	0.00016		84	123	96	6	97	1	98	3
15M116-05	0.04924	0.00224	0.0988	0.00433	0.01455	0.00016	0.00468	8e-05	1.10537	159	81	96	4	93	1	94	2		0.04924	0.00224	0.0988	0.00433	0.01455	0.00016	0.00468	8e-05		159	81	96	4	93	1	94	2
15M116-06	0.04979	0.00336	0.09977	0.00657	0.01453	0.00021	0.00497	0.00015	1.76267	185	123	97	6	93	1	100	3		0.04979	0.00336	0.09977	0.00657	0.01453	0.00021	0.00497	0.00015		185	123	97	6	93	1	100	3
15M116-07	0.04871	0.00193	0.09871	0.00374	0.01469	0.00014	0.00487	8e-05	1.60947	134	71	96	3	94	0.9	98	2		0.04871	0.00193	0.09871	0.00374	0.01469	0.00014	0.00487	8e-05		134	71	96	3	94	0.9	98	2
15M116-08	0.04783	0.00273	0.0973	0.0054	0.01475	0.00018	0.00478	0.00012	1.77314	91	101	94	5	94	1	96	2		0.04783	0.00273	0.0973	0.0054	0.01475	0.00018	0.00478	0.00012		91	101	94	5	94	1	96	2
15M116-09	0.04841	0.00165	0.09554	0.0031	0.01431	0.00012	0.00422	6e-05	1.67702	119	60	93	3	91.6	0.8	85	1		0.04841	0.00165	0.09554	0.0031	0.01431	0.00012	0.00422	6e-05		119	60	93	3	91.6	0.8	85	1
15M116-10	0.04847	0.00281	0.09817	0.00554	0.01469	0.00018	0.00469	0.00013	1.87516	122	104	95	5	94	1	95	3		0.04847	0.00281	0.09817	0.00554	0.01469	0.00018	0.00469	0.00013		122	104	95	5	94	1	95	3
15M116-11	0.04804	0.00404	0.09615	0.00791	0.01451	0.00025	0.00499	0.00017	1.4127	101	150	93	7	93	2	101	3		0.04804	0.00404	0.09615	0.00791	0.01451	0.00025	0.00499	0.00017		101	150	93	7	93	2	101	3
15M116-12	0.04837	0.00356	0.09509	0.00681	0.01426	0.00023	0.0052	0.00019	2.22102	117	130	92	6	91	1	105	4		0.04837	0.00356	0.09509	0.00681	0.01426	0.00023	0.0052	0.00019		117	130	92	6	91	1	105	4
15M116-13	0.05004	0.00366	0.09842	0.00701	0.01426	0.00023	0.00534	0.00018	1.29001	197	132	95	6	91	1	108	4		0.05004	0.00366	0.09842	0.00701	0.01426	0.00023	0.00534	0.00018		197	132	95	6	91	1	108	4
15M116-14	0.04841	0.00333	0.09676	0.00648	0.01449	0.00022	0.00521	0.00018	2.11185	119	121	94	6	93	1	105	4		0.04841	0.00333	0.09676	0.00648	0.01449	0.00022	0.00521	0.00018		119	121	94	6	93	1	105	4
15M116-15	0.0482	0.00242	0.09703	0.0047	0.0146	0.00017	0.00488	0.00011	1.62191	109	87	94	4	93	1	98	2		0.0482	0.00242	0.09703	0.0047	0.0146	0.00017	0.00488	0.00011		109	87	94	4	93	1	98	2
15M116-16	0.05026	0.00559	0.09876	0.01074	0.01425	0.00033	0.00492	0.00024	1.7021	207	202	96	10	91	2	99	5		0.05026	0.00559	0.09876	0.01074	0.01425	0.00033	0.00492	0.00024		207	202	96	10	91	2	99	5
15M116-17	0.04836	0.00388	0.0999	0.00783	0.01498	0.00025	0.00472	0.00018	1.79439	117	143	97	7	96	2	95	4		0.04836	0.00388	0.0999	0.00783	0.01498	0.00025	0.00472	0.00018		117	143	97	7	96	2	95	4
15M116-18	0.04997	0.00379	0.09826	0.00726	0.01426	0.00024	0.00518	0.00017	1.72069	194	136	95	7	91	2	104	3		0.04997	0.00379	0.09826	0.00726	0.01426	0.00024	0.00518	0.00017		194	136	95	7	91	2	104	3
15M116-19	0.04951	0.00613	0.10085	0.01219	0.01477	0.00039	0.00565	0.0003	1.64818	172	222	98	11	95	2	114	6		0.04951	0.00613	0.10085	0.01219	0.01477	0.00039	0.00565	0.0003		172	222	98	11	95	2	114	6
15M116-20	0.04827	0.00937	0.09585	0.01827	0.0144	0.00054	0.00623	0.00062	2.90477	113	295	93	17	92	3	126	12		0.04827	0.00937	0.09585	0.01827	0.0144	0.00054	0.00623	0.00062		113	295	93	17	92	3	126	12
15M116-21	0.04726	0.00305	0.09294	0.00583	0.01426	0.0002	0.00476	0.00014	1.75881	62	111	90	5	91	1	96	3		0.04726	0.00305	0.09294	0.00583	0.01426	0.0002	0.00476	0.00014		62	111	90	5	91	1	96	3
15M116-22	0.04728	0.00436	0.09496	0.00855	0.01456	0.00028	0.00596	0.00025	2.19949	63	163	92	8	93	2	120	5		0.04728	0.00436	0.09496	0.00855	0.01456	0.00028	0.00596	0.00025		63	163	92	8	93	2	120	5
15M116-23	0.04745	0.00556	0.09791	0.01123	0.01496	0.00035	0.00574	0.00035	1.48446	72	209	95	10	96	2	116	7		0.04745	0.00556	0.09791	0.01123	0.01496	0.00035	0.00574	0.00035		72	209	95	10	96	2	116	7
15M116-24	0.04741	0.00403	0.0986	0.0082	0.01508	0.00026	0.00515	0.00023	2.64991	70	151	95	8	96	2	104	5		0.04741	0.00403	0.0986	0.0082	0.01508	0.00026	0.00515	0.00023		70	151	95	8	96	2	104	5
15M116-25	0.04957	0.00218	0.10095	0.00427	0.01477	0.00015	0.00462	0.0001	1.95899	175	80	98	4	94.5	1	93	2		0.04957	0.00218	0.10095	0.00427	0.01477	0.00015	0.00462	0.0001		175	80	98	4	94.5	1	93	2
15M139B-01	0.12363	0.01289	0.29159	0.02896	0.0171	0.00061	0.01	0.00054	1.22188	2009	126	260	23	109	4	201	11		0.04605	0.00498	0.09789	0.01019	0.01542	0.00045	0.00576	0.00063			218	95	9	99	3	116	13
15M139B-02	0.05099	0.01032	0.10182	0.02036	0.01448	0.0005	0.00559	0.00054	2.02973	240	339	98	19	93	3	113	11		0.05099	0.01032	0.10182	0.02036	0.01448	0.0005	0.00559	0.00054		240	339	98	19	93	3	113	11
15M139B-03	0.05097	0.0077	0.1069	0.01587	0.01521	0.00048	0.00493	0.00033	1.31641	239	273	103	15	97	3	99	7		0.05097	0.0077	0.1069	0.01587	0.01521	0.00048	0.00493	0.00033		239	273	103	15	97	3	99	7
15M139B-04	0.18316	0.02241	0.40487	0.04613	0.01603	0.00076	0.01337	0.00089	1.34653	2682	126	345	33	103	5	268	18		0.04605	0.00848	0.0841	0.01514	0.01325	0.00051	0.00563	0.0011			315	82	14	85	3	113	22
15M139B-05	0.21827	0.01833	0.56688	0.04358	0.01883	0.0007	0.01687	0.00078	1.19113	2968	77	456	28	120	4	338	16		0.04605	0.00355	0.09346	0.00667	0.01472	0.00043	0.00676	0.00106			171	91	6	94	3	136	21
15M139B-06	0.081	0.00153	2.28397	0.0447	0.2045	0.00265	0.07011	0.0008	0.641767	1221	20	1207	14	1199	14	1370	15		0.081	0.00153	2.28397	0.0447	0.2045	0.00265	0.07011	0.0008		1221	20	1207	14	1199	14	1370	15
15M139B-07	0.04946	0.00806	0.09656	0.01553	0.01416	0.00043	0.00585	0.0004	1.69273	170	277	94	14	91	3	118	8		0.04946	0.00806	0.09656	0.01553	0.01416	0.00043	0.00585	0.0004		170	277	94	14	91	3	118	8
15M139B-08	0.0505	0.00356	0.10927	0.00762	0.01569	0.00027	0.00582	0.00016	1.2013	218	127	105	7	100	2	117	3		0.0505	0.00356	0.10927	0.00762	0.01569	0.00027	0.00582	0.00016		218	127	105	7	100	2	117	3
15M139B-09	0.2658	0.03135	0.67918	0.07202	0.01853	0.00102	0.02428	0.00164	1.57754	3281	99	526	44	118	6	485	32		0.04605	0.00936	0.0849	0.01682	0.01337	0.00061	0.00747	0.00215			344	83	16	86	4	150	43
15M139B-10	0.21976	0.01632	0.54584	0.03719	0.01802	0.0006	0.02379	0.00094	1.56492	2979	67	442	24	115	4	475	19		0.04605	0.0029	0.08925	0.00513	0.01406	0.00036	0.01098	0.00125			138	87	5	90	2	221	25
15M139B-11	0.04723	0.00868	0.10855	0.0197	0.01667	0.00055	0.0062	0.00049	1.62188	61	280	105	18	107	3	125	10		0.04723	0.00868	0.10855	0.0197	0.01667	0.00055	0.0062	0.00049		61	280	105	18	107	3	125	10
15M139B-12	0.22104	0.02363	0.57871	0.0568	0.01899	0.00087	0.02072	0.00117	1.32139	2988	100	464	37	121	6	415	23		0.04605	0.00331	0.09385	0.00591	0.01478	0.00051	0.00923	0.00159			159	91	5	95	3	186	32
15M139B-13	0.04909	0.00518	0.10306	0.01077	0.01523	0.0003	0.00561	0.00023	1.4386	152	197	100	10	97	2	113	5		0.04909	0.00518	0.10306	0.01077	0.01523	0.0003	0.00561	0.00023		152	197	100	10	97	2	113	5
15M139B-14	0.04978	0.00925	0.10725	0.0197	0.01563	0.00049	0.00641	0.00047	1.63755	185	315	103	18	100	3	129	9		0.04978	0.00925	0.10725	0.0197	0.01563	0.00049	0.00641	0.00047		185	315	103	18	100	3	129	9
15M139B-15	0.05136	0.01115	0.10397	0.02217	0.01469	0.00064	0.00713	0.00063	1.59908	257	345	100	20	94	4	144	13		0.05136	0.01115	0.10397	0.02217	0.01469	0.00064	0.00713	0.00063		257	345	100	20	94	4	144	13
15M139B-16	0.15484	0.00975	0.33411	0.01992	0.01566	0.00038	0.01506	0.00056	1.90063	2400	68	293	15	100	2	302	11		0.04605	0.00181	0.08574	0.00297	0.0135	0.00025	0.0066	0.00078			83	84	3	86	2	133	16
15M139B-17	0.04704	0.01851	0.1003	0.03903	0.01548	0.00096	0.0056	0.00113	2.09314	51	547	97	36	99	6	113	23		0.04704	0.01851	0.1003	0.03903	0.01548	0.00096	0.0056	0.00113		51	547	97	36	99	6	113	23
15M139B-18	0.05169	0.01385	0.10709	0.02831	0.01504	0.0007	0.00679	0.00065	1.23994	272	415	103	26	96	4	137	13		0.05169	0.01385	0.10709	0.02831	0.01504	0.0007	0.00679	0.00065		272	415	103	26	96	4	137	13
15M139B-19	0.32591	0.01525	0.98892	0.04122	0.02203	0.00056	0.02578	0.00069	1.02486	3598	34	698	21	140	4	514	14		0.04605	0.00474	0.09036	0.0091	0.01423	0.00031	0.00927	0.00094			211	88	8	91	2	187	19
15M139B-20	0.0473	0.00879	0.09641	0.0178	0.0148	0.00037	0.00549	0.00045	1.82392	64	298	93	16	95	2	111	9		0.0473	0.00879	0.09641	0.0178	0.0148	0.00037	0.00549	0.00045		64	298	93	16	95	2	111	9
16SL05A-01	0.05041	0.00286	0.10962	0.00602	0.01577	0.00019	0.00553	0.00011	0.873261	214	105	106	6	101	1	111	2		0.05041	0.00286	0.10962	0.00602	0.01577	0.00019	0.00553	0.00011		214	105	106	6	101	1	111	2
16SL05A-02	0.04929	0.0044	0.1068	0.00931	0.01571	0.00029	0.00569	0.00023	1.53172	162	161	103	9	100	2	115	5		0.04929	0.0044	0.1068	0.00931	0.01571	0.00029	0.00569	0.00023		162	161	103	9	100	2	115	5
16SL05A-03	0.04908	0.00322	0.10591	0.00676	0.01565	0.00022	0.00532	0.00016	1.66456	152	118	102	6	100	1	107	3		0.04908	0.00322	0.10591	0.00676	0.01565	0.00022	0.00532	0.00016		152	118	102	6	100	1	107	3
16SL05A-04	0.04913	0.00186	0.10597	0.00383	0.01564	0.00014	0.00568	8e-05	0.971938	154	68	102	4	100	0.9	114	2		0.04913	0.00186	0.10597	0.00383	0.01564	0.00014	0.00568	8e-05		154	68	102	4	100	0.9	114	2
16SL05A-05	0.05262	0.00208	0.11504	0.00434	0.01585	0.00015	0.00563	9e-05	1.20499	312	69	111	4	101.4	1	113	2		0.05262	0.00208	0.11504	0.00434	0.01585	0.00015	0.00563	9e-05		312	69	111	4	101.4	1	113	2
16SL05A-06	0.04773	0.0042	0.1036	0.00892	0.01574	0.00027	0.00532	0.00024	1.85476	86	159	100	8	101	2	107	5		0.04773	0.0042	0.1036	0.00892	0.01574	0.00027	0.00532	0.00024		86	159	100	8	101	2	107	5
16SL05A-07	0.04918	0.0027	0.10543	0.0056	0.01555	0.00019	0.00544	0.00012	1.20055	156	99	102	5	99	1	110	2		0.04918	0.0027	0.10543	0.0056	0.01555	0.00019	0.00544	0.00012		156	99	102	5	99	1	110	2
16SL05A-08	0.04729	0.00232	0.10284	0.00486	0.01577	0.00017	0.00561	9e-05	0.840047	64	84	99	4	101	1	113	2		0.04729	0.00232	0.10284	0.00486	0.01577	0.00017	0.00561	9e-05		64	84	99	4	101	1	113	2
16SL05A-09	0.04718	0.0024	0.1038	0.00511	0.01595	0.00017	0.00527	0.00011	1.37012	58	87	100	5	102	1	106	2		0.04718	0.0024	0.1038	0.00511	0.01595	0.00017	0.00527	0.00011		58	87	100	5	102	1	106	2
16SL05A-10	0.05031	0.00235	0.10896	0.0049	0.01571	0.00017	0.00518	9e-05	0.957562	209	84	105	4	100	1	104	2		0.05031	0.00235	0.10896	0.0049	0.01571	0.00017	0.00518	9e-05		209	84	105	4	100	1	104	2
16SL05A-11	0.04832	0.0016	0.10459	0.00328	0.0157	0.00013	0.0055	7e-05	1.09177	115	58	101	3	100.4	0.8	111	1		0.04832	0.0016	0.10459	0.00328	0.0157	0.00013	0.0055	7e-05		115	58	101	3	100.4	0.8	111	1
16SL05A-12	0.04845	0.00195	0.10489	0.00404	0.0157	0.00015	0.00562	9e-05	1.10676	121	71	101	4	100.4	1	113	2		0.04845	0.00195	0.10489	0.00404	0.0157	0.00015	0.00562	9e-05		121	71	101	4	100.4	1	113	2
16SL05A-13	0.04901	0.00281	0.10566	0.00585	0.01563	0.0002	0.00602	0.00013	1.1324	148	103	102	5	100	1	121	3		0.04901	0.00281	0.10566	0.00585	0.01563	0.0002	0.00602	0.00013		148	103	102	5	100	1	121	3
16SL05A-14	0.04816	0.0021	0.10463	0.00438	0.01576	0.00015	0.00578	0.0001	1.22269	107	78	101	4	100.8	1	116	2		0.04816	0.0021	0.10463	0.00438	0.01576	0.00015	0.00578	0.0001		107	78	101	4	100.8	1	116	2
16SL05A-15	0.04821	0.00091	0.10498	0.00171	0.01579	9e-05	0.00545	3e-05	0.37643	110	28	101	2	101	0.6	109.9	0.6		0.04821	0.00091	0.10498	0.00171	0.01579	9e-05	0.00545	3e-05		110	28	101	2	101	0.6	109.9	0.6
16SL05A-16	0.04881	0.0014	0.10546	0.00281	0.01567	0.00012	0.0053	4e-05	0.464821	139	48	102	3	100.2	0.8	106.8	0.8		0.04881	0.0014	0.10546	0.00281	0.01567	0.00012	0.0053	4e-05		139	48	102	3	100.2	0.8	106.8	0.8
16SL05A-17	0.04933	0.00204	0.10689	0.00425	0.01572	0.00014	0.00551	7e-05	0.832617	164	76	103	4	100.5	0.9	111	1		0.04933	0.00204	0.10689	0.00425	0.01572	0.00014	0.00551	7e-05		164	76	103	4	100.5	0.9	111	1
16SL05A-18	0.0494	0.00533	0.10716	0.01131	0.01573	0.00036	0.00539	0.00021	0.904417	167	194	103	10	101	2	109	4		0.0494	0.00533	0.10716	0.01131	0.01573	0.00036	0.00539	0.00021		167	194	103	10	101	2	109	4
16SL05A-19	0.04881	0.00254	0.10598	0.00533	0.01575	0.00018	0.00542	0.00011	1.16137	139	93	102	5	101	1	109	2		0.04881	0.00254	0.10598	0.00533	0.01575	0.00018	0.00542	0.00011		139	93	102	5	101	1	109	2
16SL05A-20	0.04961	0.0023	0.10799	0.00482	0.01579	0.00017	0.00533	0.0001	1.02712	177	84	104	4	101	1	107	2		0.04961	0.0023	0.10799	0.00482	0.01579	0.00017	0.00533	0.0001		177	84	104	4	101	1	107	2

## Sheet: Table S3
Table S3. Whole-rock major and trace element, and Sr-Nd isotopic compositions for mid-Cretaceous Mawgyi Volcanics in the Wuntho-Popa arc of Myanmar
Sample	16WD04A	16WD04B	16WD04C	16WD06B	16WD06D	16WD07A	16WD07B	16WD07C	16WD07E	16WD08A	16WD08B	16WD09A	16WD09B	16WD09C	16WD10A	16WD10B	16WD10C	16WD10D	16WD11A	16WD11B	16WD11C	15M112	15M113	15M114B	15M116	15M140A	15M140C	15M141A	15M141B	15M141C	15M101	15M102A	15M106A	15M106B	15M136A	15M136B	15M138A	15M138B	15M139A	15M139B	15M108B	15M109A	15M109B	15M109C	15M110A	15M110B	15M110C	15M111	15M114A
Latitude N	23°53'9.28"	23°53'9.28"	23°53'9.28"	23°53'11.45"	23°53'11.45"	23°53'15.66"	23°53'15.66"	23°53'15.66"	23°53'15.66"	23°53'46.67"	23°53'46.67"	23°54'18.69"	23°54'18.69"	23°54'18.69"	23°54'18.69"	23°54'18.69"	23°54'18.69"	23°54'18.69"	23°54'18.69"	23°54'18.69"	23°54'18.69"	23°56'57.50"	23°56'57.50"	23°56'57.50"	23°56'57.50"	23°57'40.91"	23°57'40.91"	23°57'40.91"	23°57'40.91"	23°57'40.91"	23°51'37.42"	23°51'37.42"	23°51'45.51"	23°51'45.51"	23°56'43.94"	3°56'43.94"	23°56'43.94"	23°56'43.94"	23°56'43.94"	23°56'43.94"	23°52'39.81"	23°57'5.08"	23°57'5.08"	23°57'5.08"	23°57'5.08"	23°57'5.08"	23°57'5.08"	23°56'57.50"	23°56'57.50"
Longitude E	95°35'33.90"	95°35'33.90"	95°35'33.90"	95°35'53.20"	95°35'53.20"	95°35'55.94"	95°35'55.94"	95°35'55.94"	95°35'55.94"	95°36'6.44"	95°36'6.44"	95°36'50.09"	95°36'50.09"	95°36'50.09"	95°36'50.09"	95°36'50.09"	95°36'50.09"	95°36'50.09"	95°36'50.09"	95°36'50.09"	95°36'50.09"	95°30'56.67"	95°30'56.67"	95°30'56.67"	95°30'56.67"	95°48'35.58	95°48'35.58	95°48'35.58	95°48'35.58	95°48'35.58	95°35'22.07"	95°35'22.07"	95°35'27.21"	95°35'27.21"	95°44'53.83"	95°44'53.83"	95°44'53.83"	95°44'53.83"	95°44'53.83"	95°44'53.83"	95°30'22.22"	95°30'43.92"	95°30'43.92"	95°30'43.92"	95°30'43.92"	95°30'43.92"	95°30'43.92"	95°30'56.67"	95°30'56.67"
Location	Wuntho	Wuntho	Wuntho	Wuntho	Wuntho	Wuntho	Wuntho	Wuntho	Wuntho	Wuntho	Wuntho	Wuntho	Wuntho	Wuntho	Wuntho	Wuntho	Wuntho	Wuntho	Wuntho	Wuntho	Wuntho	Wuntho	Wuntho	Wuntho	Wuntho	Wuntho	Wuntho	Wuntho	Wuntho	Wuntho	Wuntho	Wuntho	Wuntho	Wuntho	Wuntho	Wuntho	Wuntho	Wuntho	Wuntho	Wuntho	Wuntho	Wuntho	Wuntho	Wuntho	Wuntho	Wuntho	Wuntho	Wuntho	Wuntho
Age(Ma)																									93.69±0.25															93.5±2.4				105.7±0.3					103±4
Rock type	MORB-like	MORB-like	MORB-like	MORB-like	MORB-like	MORB-like	MORB-like	MORB-like	MORB-like	MORB-like	MORB-like	MORB-like	MORB-like	MORB-like	MORB-like	MORB-like	MORB-like	MORB-like	MORB-like	MORB-like	MORB-like	MORB-like	MORB-like	MORB-like	MORB-like	MORB-like	MORB-like	MORB-like	MORB-like	MORB-like	Low-K theloiite	Low-K theloiite	Low-K theloiite	Low-K theloiite	Low-K theloiite	Low-K theloiite	Low-K theloiite	Low-K theloiite	Low-K theloiite	Low-K theloiite	Low-K theloiite	Low-K theloiite	Low-K theloiite	Low-K theloiite	Low-K theloiite	Low-K theloiite	Low-K theloiite	Low-K theloiite	Low-K theloiite
Lithology	B	B	B	B	B	B	B	B	B	BA	BA	BA	BA	B	BA	BA	BA	BA	B	B	B	BA	BA	BA	Gabbro	B	B	B	B	B	B	BA	BA	BA	B	B	B	B	BA	BA	B	B	B	B	B	B	B	B	BA
Major element (wt%)
SiO2	49.12	48.96	49.34	49.81	50.26	47.99	48.63	48.73	48.28	53.43	52.53	53.05	54.7	49.68	52.88	52.82	52.36	53.22	50.07	49.24	49.95	52.7682	53.6212	53.4273	50.0832	49.0721	49.794	49.169	49.1747	48.8694	49.3423	51.1772	53.1499	51.9879	50.5084	52.8533	49.9428	49.8065	56.3589	56.6708	49.1812	49.8102	49.5499	49.384	48.9185	51.3935	49.3028	50.8907	52.9634
TiO2	0.59	0.6	0.6	0.76	0.76	0.71	0.68	0.69	0.7	0.58	0.49	0.89	0.54	0.66	0.74	0.74	0.79	0.75	0.81	0.79	0.71	0.791476	0.775054	0.768339	0.334399	0.666945	0.661461	0.653379	0.679909	0.687757	0.854648	0.680235	0.968321	1.13422	0.92782	0.831283	0.61632	0.637888	0.623501	0.617643	1.76804	1.02995	0.982636	1.04297	0.97596	1.53237	0.991193	0.767388	0.86454
Al2O3	15.59	15.72	15.94	17.08	17.22	17.26	16.48	16.73	16.77	16.15	16.79	17.49	16.47	18.41	17.46	17.46	17.54	17.28	17.89	18.42	17.29	17.4256	16.7784	16.4953	14.2373	15.7705	15.257	15.6794	15.6652	15.707	17.751	15.0026	17.9444	18.398	19.5701	17.7613	18.0996	18.2887	17.2698	17.3997	14.7839	16.0333	16.0426	15.7841	15.7158	15.6624	15.6933	15.9055	17.9379
Fe2O3	9.39	9.68	9.47	10.63	10.65	10.4	10.22	10.26	10.21	7.47	6.86	10.16	8.58	9.36	9.78	10.2	10.22	10.24	10.03	9.9	9.58	9.94785	8.63755	8.87635	8.06002	9.96959	9.73147	9.89768	9.9458	10.085	10.0073	9.45543	9.69618	10.1273	10.4005	9.48453	9.80354	9.86414	6.94343	6.91749	15.4918	10.957	10.8292	11.1306	11.0357	12.8818	10.9998	9.82319	8.94091
MnO	0.17	0.18	0.17	0.19	0.18	0.18	0.2	0.19	0.19	0.16	0.16	0.13	0.13	0.14	0.09	0.1	0.1	0.1	0.14	0.14	0.14	0.147925	0.165496	0.17146	0.147806	0.152625	0.149407	0.145718	0.141988	0.144319	0.15665	0.145731	0.142852	0.172129	0.130601	0.117502	0.148845	0.155125	0.141471	0.136314	0.261744	0.180095	0.173606	0.175047	0.173349	0.209315	0.178826	0.167482	0.194905
MgO	7.45	7.87	7.49	5.53	5.63	6.46	7.34	6.94	7.2	3.91	3.18	4.42	5.95	6.83	4.65	4.67	4.52	4.58	5.61	5.38	5.84	3.69304	5.47336	5.45513	10.5458	7.66789	7.49248	7.5338	7.70952	7.82583	7.77485	7.58169	3.78853	5.11145	2.71085	2.67927	6.84183	6.78367	4.70271	4.79794	5.58229	7.2664	7.3683	7.14534	7.59871	5.13167	7.53659	7.33457	5.26926
CaO	9.08	8.54	9.02	7.03	6.73	8.75	7.45	7.25	7.44	11.06	12.57	7.82	7.69	7.1	8.55	8.93	8.66	8.92	8.51	8.88	8.53	10.8025	8.71259	9.23326	13.6169	8.30629	8.60269	8.57897	8.51479	8.26897	5.46952	7.3519	4.2121	2.73406	9.17221	8.81934	8.10064	8.36828	9.12115	9.02901	10.6889	11.189	11.1148	11.3723	11.3939	9.35838	11.1564	11.0838	9.59957
Na2O	3.47	3.38	3.55	4.83	4.91	3.56	3.73	3.89	3.76	4.57	4.37	3.65	2.84	3.71	2.9	2.51	2.49	2.6	3.23	3.33	3.52	3.34111	4.54229	4.40728	1.24232	3.93561	3.03876	3.98876	3.92711	3.94954	4.47496	3.4848	7.00168	6.92614	2.4305	2.60912	3.64617	3.77536	3.01565	3.02651	1.52425	2.86472	2.83793	2.72326	2.66825	3.01788	2.76608	3.03791	3.32505
K2O	0.93	0.89	0.84	0.56	0.52	0.87	0.9	0.89	0.88	0.04	0.04	0.16	0.38	0.4	0.29	0.31	0.35	0.31	0.39	0.43	0.41	0.163508	0.134668	0.116135	0.105246	0.0764653	0.261276	0.0751154	0.0755779	0.07979	0.246143	0.202131	0.123421	0.199762	0.258188	0.267699	0.368891	0.398105	0.396307	0.396834	0.078831	0.138847	0.136744	0.129012	0.134522	0.114114	0.150678	0.0893108	0.250211
P2O5	0.06	0.06	0.06	0.08	0.08	0.08	0.07	0.07	0.08	0.12	0.07	0.1	0.07	0.07	0.08	0.08	0.08	0.08	0.09	0.09	0.08	0.0858738	0.0933522	0.0850929	0.0427748	0.0472057	0.0710615	0.0475723	0.049393	0.0468735	0.0819376	0.0714267	0.134391	0.143891	0.146531	0.10048	0.0837054	0.0824003	0.115074	0.116985	0.383298	0.133193	0.131213	0.143722	0.125533	0.173336	0.125797	0.111761	0.118491
LOI	3.5	3.74	3.72	3.4	3.58	3.98	3.8	3.86	3.94	2.74	2.72	1.98	2.66	3.18	2.04	1.84	2.66	1.84	3.72	3.58	4.3	0.372936	0.696056	0.664374	1.25419	3.94479	4.3604	3.94065	3.97594	4.09551	3.8907	4.74686	2.44829	3.0051	3.69433	4.42622	1.76768	1.53985	0.701988	0.740741	0.0557991	0.487201	0.523029	0.589541	0.649729	0.475323	0.718535	0.668369	0.615737
Total	99.34	99.62	100.2	99.9	100.51	100.23	99.51	99.5	99.44	100.24	99.77	99.85	100.01	99.53	99.46	99.65	99.78	99.91	100.48	100.17	100.35	99.54	99.63	99.7	99.67	99.61	99.42	99.71	99.86	99.76	100.05	99.9	99.61	99.94	99.95	99.95	99.42	99.7	99.39	99.85	99.8	100.09	99.69	99.62	99.39	99.95	99.62	99.88	100.08
Trace element (ppm)
Sc	40.68	41.4154	42.0609	41.293	41.4963	39.146	42.1147	41.6634	41.9585	32.8215	28.1031	35.2163	14.3694	38.8015	32.9405	33.187	34.9571	32.0688	36.7407	33.6874	32.9911	36.55	35.37	35.13	55.65	41.2	40.82	38.39	44.35	42.76	38.3	37.82	29.31	31.96	30.07	27.52	31.69	30.95	23.88	22.36	43.76	41.08	39.92	40.74	41.88	35.16	41.78	41.19	33.61
V	363.2	338.561	365.076	385.508	383.806	404.369	339.307	339.984	344.609	324.626	288.027	377.049	156.286	348.596	325.809	348.433	357.756	333.333	374.563	340.281	276.802	337.1	249.4	254	181.3	252.3	266.8	244.2	280.4	252.5	278.9	271.1	282	259.8	278.6	307.5	215.1	220.7	184.4	173.9	442.3	319.5	304.8	331.5	324.7	356.6	306	252.1	265.1
Cr	169.14	164.877	176.604	39.1713	41.7146	86.8123	128.276	104.978	101.503	28.0957	25.4447	10.8671	10.2052	23.5915	13.9393	24.2467	20.6029	13.4618	31.8338	41.8437	113.485	18.46	84.79	85.1	383.9	69.63	130.4	125.7	292.6	143.4	32.78	42.27	26.21	6.906	11.39	10.69	20.57	22	118.7	132.1	19.2	120.1	104.4	112	135.2	52.4	122.6	36.89	93.76
Co	33.72	35.0422	35.425	31.8054	32.05	32.4926	35.3843	34.8084	34.7181	22.1137	20.3678	28.0071	11.2749	31.1368	25.3895	29.1159	28.9878	27.9194	29.0736	26.0721	27.4038	32.85	27.14	27.16	41.74	35.96	34.06	32.67	38.34	35.62	32.08	26.21	21.01	24.85	30.66	25	36.84	35.11	20.81	20.24	33.85	40.21	39.17	39.96	40.49	34.73	40.37	39.16	26.82
Ni	49.94	49.0752	52.7867	29.8439	24.7073	35.7895	52.0112	44.3501	40.6924	15.9103	16.5561	10.2034	7.32978	16.9281	11.69	16.8529	14.8153	12.79	19.9447	19.9399	30.2468	16.49	28.08	28.43	92.95	59.73	58.36	55.97	219.7	67.33	30.43	485	8.554	9.52	12.92	10.57	22.15	20.58	36.26	47.63	9.021	52.43	51.04	50.93	54.92	21.11	54.53	39.39	34.52
Cu	72.28	71.2505	71.1307	98.779	84.7787	80.6951	81.5611	86.1912	81.82	96.3709	65.2808	110.429	34.2806	71.1925	58.9293	39.6328	79.2573	43.5092	89.9606	90.1202	83.9684	146.5	52.79	91.18	16.11	60.22	105.8	54.89	69.4	56	49.14	3.532	15.01	94.48	64.53	86.75	7.077	5.426	62.51	28.6	35.23	64.04	56.55	63.36	45.24	22.13	54.39	118.1	68.02
Zn	49.6	55.2473	47.7546	67.0336	63.0284	62.3039	60.5337	61.4777	56.6568	41.0169	33.8397	64.606	24.6892	60.6012	61.4862	59.2896	60.9303	56.2339	45.7163	40.4609	43.001	84.86	108	102.9	72.83	80.69	73.49	74.61	82.66	80.36	73.63	59.7	92.95	115.7	84.28	79.3	85.11	90.86	68.84	59.89	121	96.51	91.63	92.44	92.29	109.6	95.72	64.16	104.2
Ga	14.226	13.5967	13.9254	14.2094	14.6636	15.2671	13.4628	13.6725	13.7705	12.5503	13.2441	16.1031	6.46339	14.7362	14.7883	15.2983	15.4083	14.8745	15.97	15.4549	15.1017	17.1	14.51	14.95	11.51	14.08	14.08	12.81	14.39	13.48	14.96	13.06	18.44	16.32	17.63	15.62	14.91	14.73	16.97	16.18	17.69	15.77	15.11	15.76	15.23	18.49	15.2	14.22	16.69
Ge	3.852	3.5002	3.99358	3.8691	4.18337	4.06157	3.64198	3.64678	3.9367	3.00897	2.93424	3.88307	1.87093	3.44615	3.64962	3.89343	4.02476	4.05651	3.89897	3.78557	3.49654	2.233	2.301	2.273	2.04	2.043	2.411	2.225	2.462	2.24	2.123	2.202	2.544	2.114	2.472	2.118	2.408	2.268	2.032	1.902	3.128	2.389	2.246	2.52	2.404	2.728	2.261	2.438	2.21
Rb	10.852	10.8323	10.1363	6.23899	5.71939	11.5591	12.3536	11.7483	11.4421	0.701894	0.519688	4.55264	3.23071	7.63289	3.70755	3.57813	3.72529	3.68702	4.9785	5.42685	4.62784	0.842	1.26	1.115	1.117	0.583	2.295	0.485	0.569	0.632	2.832	2.055	0.779	1.612	3.301	4.142	8.468	9.295	7.831	7.68	0.185	1.552	1.561	1.093	1.273	1.194	1.89	0.498	2.876
Sr	207.8	199.618	202.686	170.677	167.533	197.299	208.084	210.786	210.682	58.6042	59.4843	258.937	102.467	247.661	242.909	227.699	242.963	220.51	215.088	213.627	207.502	126	237.4	234.6	117.3	132.2	130.6	104.9	126.1	116.9	231.9	184.3	212	122.9	315.3	294.2	295.7	303	328.6	315.8	254.4	194.6	193.7	190.9	190.4	193.5	193.7	230.7	255.4
Y	13.21	13.7073	13.2598	16.6673	16.535	15.7716	15.2609	15.7092	15.5747	13.1505	10.8675	19.2593	6.35287	14.9015	17.8266	18.6629	18.5486	18.7275	16.6407	15.6313	14.0888	17.99	19.47	18.15	12.5	15.11	15.15	14.86	15.27	15.38	15.12	12.11	22.59	24.55	15.37	15.93	16.35	15.87	13.42	12.64	17.48	16.68	15.99	16.78	15.54	24.49	16.29	16.12	19.85
Zr	33.58	34.4592	33.34	42.9143	42.5878	43.1579	39.8049	40.0237	41.0485	30.6082	26.1843	55.1649	13.9964	34.3022	51.658	51.4069	54.9411	51.3337	45.4505	40.4409	37.7887	43.4	56.47	54.02	15.94	30.1	35.24	32.49	38.09	35.78	41.43	34.34	62.44	70.66	50.41	46.7	52.18	53.17	57.96	54.98	32.24	50.45	48.68	50.93	46.02	70.84	48.82	53.39	67.62
Nb	0.412	0.418175	0.390938	0.596477	0.575511	0.671301	0.599363	0.574872	0.603363	0.374875	0.343794	0.815722	0.175646	0.483775	0.629245	0.620635	0.656818	0.632286	0.697194	0.597194	0.566634	0.604	0.95	0.893	0.187	0.426	0.408	0.381	0.485	0.475	0.636	0.502	1.239	1.373	1.115	1.118	1.341	1.37	2.415	2.296	0.858	1.668	1.595	1.734	1.515	1.828	1.6	1.609	1.269
Cs	1.73	0.727784	0.561347	0.284227	0.257988	0.61569	0.557547	0.557092	0.599407	0.109671	0.0759544	2.26348	1.64002	3.99164	0.619257	0.580722	0.576961	0.77455	2.26742	2.04008	1.90326	0.038	0.223	0.184	0.164	0.211	0.214	0.133	0.193	0.135	1.22	0.43	0.108	0.318	0.425	0.323	0.701	0.774	1.065	1.124	0.012	0.113	0.123	0.084	0.113	0.277	0.163	0.158	0.084
Ba	50.3	51.2867	56.8565	49.3395	46.2989	68.9772	72.3417	67.7795	70.0297	7.62911	6.98181	20.7782	15.5812	25.6022	55.9928	56.0168	60.551	53.9221	52.5247	54.4689	59.5656	42.38	32.79	28.94	28.95	9.346	38.48	9.043	10.38	13.9	42.83	37.39	12.23	17.75	84.7	87.4	125	136.5	153	130.7	21.68	53.06	47.6	45.4	41.51	67.5	55.9	32.54	42.58
La	2.39	2.34821	2.05694	2.58607	2.42508	3.16783	2.76981	2.72422	3.01484	2.23131	1.663	2.70393	0.822972	2.38901	2.70276	2.6342	2.74107	2.5904	2.57001	2.30862	2.06318	3.385	3.07	3.051	1.577	1.747	1.978	1.553	1.648	1.689	4.077	3.075	4.62	4.638	7.223	7.338	7.785	7.582	6.99	6.789	3.903	4.589	4.295	4.665	4.114	5.832	4.415	5.12	4.243
Ce	5.832	5.85846	5.14635	6.73139	6.33062	7.65442	6.84588	6.87278	7.83581	5.62712	4.28343	7.27039	2.14525	5.90882	6.99561	6.83696	7.23498	6.73977	6.77771	6.14228	5.69003	8.624	8.829	8.3	4.374	4.827	5.529	4.373	4.871	4.752	9.87	7.762	11.88	12.6	17.21	16.56	17.47	17.18	15.98	15.49	10.16	11.15	10.41	11.23	10.17	14.28	10.45	12.09	11.06
Pr	0.892	0.904704	0.805934	1.05685	1.01211	1.15988	1.06531	1.06085	1.10584	0.89332	0.691585	1.17914	0.347346	0.951623	1.13863	1.08362	1.14793	1.06698	1.08566	0.987976	0.916091	1.378	1.417	1.339	0.722	0.834	0.922	0.763	0.844	0.804	1.513	1.187	1.887	2.012	2.298	2.234	2.319	2.296	2.063	2.003	1.593	1.627	1.546	1.661	1.497	2.221	1.547	1.757	1.752
Nd	4.56909	4.6277	4.2502	5.61176	5.38888	5.83732	5.37996	5.42545	5.54626	4.7657	3.71232	6.23238	1.89461	4.97711	5.81666	5.6893	6.03278	5.65645	5.69131	5.26325	4.82994	6.985	7.347	6.783	4.001	4.542	4.943	4.11	4.586	4.34	7.419	6.01	9.554	10.28	10.5	10.04	10.64	10.44	9.01	8.746	8.213	7.972	7.576	8.044	7.433	11.1	7.513	8.2	8.594
Sm	1.584	1.62043	1.51965	1.96157	1.95277	1.99007	1.84588	1.88266	1.88526	1.59721	1.28523	2.23583	0.704559	1.7818	2.10547	2.04151	2.15812	2.0411	2.0098	1.84369	1.71964	2.276	2.408	2.218	1.433	1.649	1.741	1.5	1.695	1.567	2.196	1.743	2.94	3.254	2.916	2.708	2.794	2.804	2.305	2.253	2.612	2.436	2.262	2.415	2.247	3.371	2.256	2.366	2.587
Eu	0.631135	0.599832	0.582028	0.75894	0.733613	0.745788	0.757313	0.75903	0.757354	0.659568	0.540658	0.825755	0.400631	0.663247	0.791361	0.784014	0.817733	0.775548	0.775213	0.748011	0.684682	0.88	0.838	0.838	0.507	0.637	0.658	0.611	0.657	0.618	0.715	0.458	1.164	1.072	0.948	0.961	0.914	0.89	0.796	0.765	1.257	0.929	0.887	0.943	0.896	1.335	0.879	0.834	0.938
Gd	2.00392	2.04396	1.94388	2.51574	2.45536	2.41058	2.30749	2.33962	2.35837	2.00184	1.63039	2.82906	0.955819	2.24848	2.63801	2.58255	2.69906	2.58029	2.56171	2.35373	2.13886	2.703	2.903	2.62	1.749	2.025	2.161	1.953	2.067	1.98	2.473	1.95	3.398	3.766	2.923	2.805	2.906	2.857	2.407	2.224	3.055	2.779	2.648	2.768	2.561	3.943	2.606	2.566	2.968
Tb	0.351579	0.355533	0.346094	0.440352	0.430328	0.424398	0.408728	0.413816	0.412307	0.340033	0.281936	0.505213	0.166194	0.396073	0.504658	0.472644	0.483341	0.467975	0.451955	0.40924	0.372006	0.499	0.538	0.511	0.34	0.417	0.417	0.386	0.411	0.4	0.444	0.35	0.627	0.707	0.485	0.489	0.498	0.487	0.4	0.383	0.532	0.489	0.475	0.491	0.46	0.718	0.474	0.462	0.544
Dy	2.394	2.43868	2.41179	3.00841	2.95892	2.87388	2.79769	2.82695	2.79327	2.30309	1.89886	3.45842	1.13677	2.71153	3.2461	3.2728	3.33799	3.28789	3.05457	2.8016	2.54097	3.303	3.544	3.317	2.263	2.714	2.717	2.568	2.792	2.644	2.877	2.285	4.054	4.502	3.061	3.052	3.068	2.98	2.423	2.324	3.349	3.157	3.033	3.133	2.936	4.47	2.995	2.944	3.534
Ho	0.524444	0.538355	0.523479	0.658304	0.643867	0.617897	0.610646	0.616796	0.611056	0.489642	0.415306	0.754932	0.243405	0.590616	0.732454	0.725072	0.723143	0.720104	0.661074	0.605656	0.541845	0.71	0.781	0.728	0.494	0.588	0.597	0.566	0.607	0.584	0.613	0.486	0.88	0.967	0.648	0.631	0.641	0.624	0.509	0.488	0.709	0.675	0.635	0.657	0.62	0.954	0.648	0.626	0.761
Er	1.46364	1.47494	1.46169	1.83237	1.78968	1.70624	1.68712	1.70791	1.70308	1.36318	1.15567	2.11158	0.651273	1.60896	1.99397	2.04459	2.0327	2.019	1.82709	1.69794	1.51485	2.031	2.224	2.072	1.415	1.697	1.726	1.633	1.789	1.654	1.747	1.395	2.457	2.795	1.829	1.763	1.789	1.759	1.477	1.41	1.952	1.828	1.757	1.826	1.729	2.739	1.809	1.764	2.178
Tm	0.223913	0.233825	0.230989	0.291538	0.286893	0.267691	0.26622	0.272705	0.268783	0.214574	0.182499	0.334911	0.0986777	0.251019	0.345238	0.329709	0.318991	0.3286	0.288905	0.263571	0.233916	0.301	0.333	0.316	0.21	0.255	0.258	0.24	0.266	0.249	0.259	0.203	0.37	0.409	0.271	0.254	0.269	0.261	0.224	0.21	0.275	0.272	0.256	0.273	0.247	0.398	0.267	0.262	0.327
Yb	1.45905	1.5222	1.49502	1.88341	1.84655	1.76479	1.73522	1.72527	1.72201	1.37112	1.17263	2.17639	0.62214	1.60974	2.11556	2.12675	2.10668	2.11891	1.88099	1.70054	1.49297	1.897	2.116	1.954	1.299	1.556	1.617	1.527	1.665	1.603	1.625	1.278	2.31	2.559	1.69	1.597	1.685	1.655	1.454	1.357	1.677	1.661	1.615	1.649	1.543	2.442	1.596	1.629	2.092
Lu	0.223158	0.230673	0.225805	0.286545	0.279922	0.263419	0.259909	0.266173	0.262377	0.209897	0.180944	0.330572	0.097639	0.240997	0.344849	0.329801	0.315222	0.330702	0.284086	0.253138	0.224451	0.294	0.326	0.313	0.203	0.242	0.244	0.236	0.257	0.245	0.249	0.199	0.347	0.394	0.262	0.247	0.262	0.251	0.226	0.215	0.254	0.257	0.245	0.258	0.234	0.377	0.244	0.257	0.328
Hf	1.098	1.18014	1.16079	1.38311	1.4229	1.37239	1.28634	1.30383	1.35114	1.02094	0.881471	1.79735	0.467732	1.15668	1.73392	1.71423	1.85466	1.76052	1.56613	1.40681	1.28727	1.346	1.637	1.586	0.577	1.015	1.098	1.029	1.136	1.119	1.24	1.036	1.803	2.103	1.524	1.419	1.471	1.479	1.68	1.623	1.007	1.393	1.344	1.375	1.27	1.931	1.324	1.485	1.892
Ta	0.028	0.0301568	0.0280674	0.0440352	0.0416749	0.0476663	0.041816	0.0414856	0.0435213	0.0259222	0.0239856	0.0572783	0.0138149	0.0338443	0.0459449	0.045899	0.0499102	0.0474215	0.051114	0.0440882	0.041461	0.05	0.081	0.073	0.024	0.04	0.039	0.038	0.044	0.053	0.05	0.037	0.087	0.1	0.086	0.087	0.087	0.092	0.164	0.153	0.058	0.119	0.112	0.117	0.105	0.124	0.114	0.11	0.093
Pb	3.138	2.87897	2.56215	3.67694	3.40147	3.24131	3.54241	3.38404	3.14144	2.66201	2.93424	2.77306	1.03414	2.13219	3.90332	3.40052	3.67339	3.0409	2.12021	1.95992	2.12043	8.146	7.426	7.369	4.015	3.604	1.97	2.208	2.517	2.532	2.324	3.259	7.739	6.096	4.375	4.895	4.638	5.477	4.346	4.08	7.712	5.278	5.376	5.015	5.165	6.415	5.262	6.971	5.388
Th	0.476	0.48452	0.439054	0.51241	0.533836	0.673287	0.581442	0.563019	0.597428	0.333001	0.28383	0.442425	0.146043	0.487756	1.0008	0.54081	0.545019	0.509781	0.560209	0.466934	0.471866	0.565	0.3	0.286	0.177	0.185	0.184	0.169	0.205	0.19	0.958	0.715	0.621	0.68	2.937	2.534	2.2	2.2	1.758	1.686	0.846	1.004	0.951	1.043	0.917	1.053	0.96	1.237	0.621
U	0.158	0.164857	0.150361	0.170136	0.174638	0.19861	0.179211	0.177795	0.183976	0.159521	0.123926	0.187636	0.053286	0.169222	0.211746	0.189583	0.207626	0.191662	0.188099	0.178357	0.17769	0.506	0.154	0.197	0.071	0.101	0.101	0.091	0.105	0.097	0.269	0.188	0.249	0.265	0.794	0.647	0.441	0.447	0.472	0.45	0.253	0.259	0.396	0.275	0.244	0.351	0.258	0.366	0.246
Isotopes
87Rb/87Sr&	0.151887				0.0985368	0.170243				0.0345891		0.0514475			0.0441075				0.0673082				0.0158563		0.027154	0.0131419					0.034962	0.0329938	0.0109268				0.083235		0.068733			0.0238076			0.0197704			0.00627568	0.0328788
87Sr/86Sr	0.705648				0.705396	0.705457				0.70514		0.704723			0.704791				0.705077				0.704564		0.704788	0.7054					0.704697	0.704632	0.704916				0.704897		0.704207			0.704127			0.70414			0.705049	0.704609
2б	9.79e-06				2.18e-05	1e-05				1.12e-05		9.17e-06			1.07e-05				1.24e-05				2.95e-05		2.89e-05	1.45e-05					1.08e-05	5.91e-06	9.12e-06				8.89e-06		1e-05			5.59e-06			7.04e-06			1.76e-05	1.51e-05
87Sr/86Sri	0.705447				0.705266	0.705232				0.705095		0.704656			0.704733				0.704988				0.704543		0.704752	0.705383					0.70465	0.704588	0.704901				0.704787		0.704116			0.704096			0.704111			0.70504	0.70456
147Sm/144Nd#	0.210282				0.223911	0.208469				0.20152		0.214521			0.218892				0.212126				0.198759		0.211596	0.214955					0.179734	0.171292	0.182627				0.159695		0.154499			0.181368			0.179734			0.176944	0.182774
143Nd/144Nd	0.512886				0.512905	0.512808				0.512819		0.512983			0.512886				0.512865				0.512912		0.512733	0.512995					0.512896	0.512916	0.512992				0.512819		0.512776			0.512839			0.512823			0.512825	0.512937
2б	3.58e-06				3.98e-06	3.5e-06				3.39e-06		7.38e-06			4.1e-06				3.59e-06				3.31e-06		5.46e-06	3.03e-06					3.09e-06	3.45e-06	3.52e-06				6.16e-06		3.2e-06			3.3e-06			4.3e-06			3.94e-06	3.14e-06
εNdi	4.6459				4.84507	3.14943				3.43093		6.48037			4.54563				4.22011				5.27827		1.64505	6.70742					5.20559	5.68628	7.04824				3.93719		3.16183			4.07404			3.80277			3.86748	5.98249
Estimated uncertainties for the XRF were below 5%, and below 10% for the ICP-MS.
*Total Fe as Fe2O3.
& and #: Concentrations of Rb, Sr, Sm and Nd were determined by ICP-MS. (87Rb/86Sr)sample = (Rb/Sr)sample ×2.8956; (147Sm/144Nd)sampe=Sm/Nd×0.60456.
LOI = loss on ignition.
Corrected formula as follows: (87Sr/86Sr)i = (87Sr/86Sr)sample - 87Rb/86Sr (eλt – 1), λ = 1.42 × 10–11 a–1;
(143Nd/144Nd)i = (143Nd/144Nd)sample + (147Sm/144Nd)m × (eλt – 1), εNd(t) = [(143Nd/144Nd)sample / (143Nd/144Nd)CHUR(t) – 1] × 104, (143Nd/144Nd)CHUR(t) = 0.512638 – 0.1967 × (eλt – 1).
B: basalt; BA: basaltic andesite; R: rhyolite; D: dolerite
[truncated: 34 more columns]

## Sheet: Table S4
	Table S4. Published ages of Neotethyan ophiolites and associated metamorphic rocks from eastern Mediterranean, Middle East, Pakistan, Yarlung-Tsangpo suture and Southeast Asia
	Locality	Lithology	Dating method	Age (Ma)	References
	Yoncayolu, Izmir-Ankara-Erzincan suture, Turkey	metabasic rock	plagioclase Ar-Ar	100.8±3.4	Gücer and Aslan, 2014
		metabasic rock	plagioclase Ar-Ar	94.1±3.3	Gücer and Aslan, 2014
	Amasia, Sevan-Akera suture (Lesser Caucasus), Armenia		hornblende Ar-Ar	90.3±0.4	Hässig et al., 2013
			hornblende Ar-Ar	91.2±3.2	Hässig et al., 2013
		amphibolite	hornblende Ar-Ar	87.7±2.8	Hässig et al., 2019
		amphibolite	hornblende Ar-Ar	91.2±1.6	Hässig et al., 2019
		amphibolite	hornblende Ar-Ar	90.3±1.5	Hässig et al., 2019
		schist	mica Ar-Ar	89.7±1.6	Hässig et al., 2019
			rutile-U-Pb	90.2±5.2	Hässig et al., 2019
	Stepanavan, Sevan-Akera suture (Lesser Caucasus), Armenia	blueschist	phengite Ar-Ar	93.9±1.6	Rolland et al., 2009
		blueschist	phengite Ar-Ar	91.6±0.4	Rolland et al., 2009
	Kiziltepe, Turkey		hornblende Ar-Ar	91±1.1	Dilek and Whiney, 1997
	Tauride, Turkey	amphibolite	hornblende Ar-Ar	91.7±0.6	Dilek et al., 1999
		amphibolite	hornblende Ar-Ar	90.4±0.9	Dilek et al., 1999
		amphibolite	hornblende Ar-Ar	90.6±0.9	Dilek et al., 1999
		amphibolite	hornblende Ar-Ar	91.3±0.4	Dilek et al., 1999
		amphibolite	hornblende Ar-Ar	91±0.8	Dilek et al., 1999
		dike	hornblende Ar-Ar	90.8±0.8	Dilek et al., 1999
		dike	hornblende Ar-Ar	91±0.6	Dilek et al., 1999
		metamorphic sole	hornblende Ar-Ar	96.1±0.3	Parlak and Delaloye, 1999
		metamorphic sole	hornblende Ar-Ar	93.6±0.4	Parlak and Delaloye, 1999
		metamorphic sole	hornblende Ar-Ar	93.4±0.5	Parlak and Delaloye, 1999
		metamorphic sole	hornblende Ar-Ar	93.7±0.3	Parlak and Delaloye, 1999
		metamorphic sole	hornblende Ar-Ar	92.7±0.3	Parlak and Delaloye, 1999
		metamorphic sole	hornblende Ar-Ar	91.8±0.3	Parlak and Delaloye, 1999
		metamorphic sole	hornblende Ar-Ar	91.9±0.3	Parlak and Delaloye, 1999
	Kutahya, Anatolide	metamorphic sole	Ar-Ar	93±2.2	Önen and Hall, 2000
	Anatolide, Turkey	amphibolite	hornblende Ar-Ar	93±2	Önen, 2003
		amphibolite	hornblende Ar-Ar	90±3.0	Önen, 2003
	Tavsanh, Turkey	lawsonite eclogite	phengite Ar-Ar	90-93	Fornash et al., 2016
	Lucian, Turkey	amphibolite	hornblende Ar-Ar	93.1±0.9	Celik et al., 2006
		amphibolite	hornblende Ar-Ar	93±0.9	Celik et al., 2006
		mica schist	muscovite Ar-Ar	93±1	Celik et al., 2006
		mica schist	muscovite Ar-Ar	93.6±0.8	Celik et al., 2006
		amphibolite	hornblende Ar-Ar	90.7±0.5	Celik et al., 2006
		amphibolite	hornblende Ar-Ar	91.3±0.9	Celik et al., 2006
		mica schist	muscovite Ar-Ar	91.2±2.3	Celik et al., 2006
		amphibolite	hornblende K-Ar	102±4	Thuizat et al., 1981
		amphibolite	plagioclase K-Ar	83±3	Thuizat et al., 1981
		muscovite schist	plagioclase K-Ar	88±4	Thuizat et al., 1981
		muscovite schist	muscovite K-Ar	93±3	Thuizat et al., 1981
		muscovite schist	muscovite K-Ar	91±3	Thuizat et al., 1981
		hornblendite	hornblende K-Ar	98±4	Thuizat et al., 1981
	Antalya, Turkey	garnet amphibolite	hornblende K-Ar	94±4	Thuizat et al., 1981
		garnet amphibolite	plagioclase K-Ar	102±7	Thuizat et al., 1981
		amphibolite	hornblende Ar-Ar	93±1	Celik et al., 2006
		amphibolite	hornblende Ar-Ar	93.8±1.7	Celik et al., 2006
	Beyshehir, Turkey	amphibolite	hornblende K-Ar	93±3	Thuizat et al., 1981
		amphibolite	plagioclase K-Ar	84±3	Thuizat et al., 1981
	Mersin, Turkey	hornblendite	hornblende K-Ar	94±4	Thuizat et al., 1981
		hornblendite	hornblende K-Ar	98±4	Thuizat et al., 1981
	Pozanti-Karsanti, Turkey	amphibolite	biotite K-Ar	92±3	Thuizat et al., 1981
		amphibolite	hornblende K-Ar	95±4	Thuizat et al., 1981
	Sarikaraman, Turkey	plagiogranite	zircon U-Pb, TIMS	90.56±0.14	van Hinsbergen et al., 2016
		plagiogranite	zircon U-Pb, TIMS	89.29±0.40	van Hinsbergen et al., 2016
	Troodos, Cyprus	plagiogranite	zircon U-Pb	91.2±1	Mukasa and Ludden, 1987
		plagiogranite	zircon U-Pb	91.6±1.4	Mukasa and Ludden, 1987
		amphibolite	hornblende Ar-Ar	88.9±0.8	Chan et al., 2007
		amphibolite	hornblende Ar-Ar	80.5±0.3	Chan et al., 2007
		amphibolite	hornblende Ar-Ar	76.5±0.4	Chan et al., 2007
		amphibolite	hornblende Ar-Ar	75.7±0.3	Chan et al., 2007
	Kizildag, Turkey	plagiogranite	zircon U-Pb	91.557±1	Dilek and Thy, 2009.
		plagiogranite	zircon U-Pb, LA-ICP-MS	91.7±1.9	Karaoglan et al., 2012
		gabbro	zircon U-Pb, LA-ICP-MS	91.6±3.8	Karaoglan et al., 2012
		gabbro	Sm-Nd isochron	95.3±6.9	Karaoglan et al., 2012
	Baer-Bassit, Syria	amphibolite	hornblende Ar-Ar	88.4±0.4	Chan et al., 2007
		amphibolite	hornblende Ar-Ar	81.6±0.3	Chan et al., 2007
		amphibolite	hornblende Ar-Ar	81.6±0.3	Chan et al., 2007
		amphibolite	hornblende Ar-Ar	78.7±0.3	Chan et al., 2007
		amphibolite	hornblende Ar-Ar	75.9±0.7	Chan et al., 2007
		amphibolite	hornblende Ar-Ar	71.7±0.5	Chan et al., 2007
		amphibolite	hornblende K-Ar	86±2	Thuizat et al., 1981
		amphibolite	plagioclase K-Ar	93±4	Thuizat et al., 1981
		amphibolite	hornblende K-Ar	88±3	Thuizat et al., 1981
	Hasanbag, Iran	Basalt	hornblende Ar-Ar	92.35±1.44	Ali et al., 2012
		Basalt	hornblende Ar-Ar	95.8±8.9	Ali et al., 2012
	Khoy ophiolite,Iran	amphibolite	hornblende Ar-Ar	109.43±1.1	Ghazi et al., 2003
		amphibolite	hornblende Ar-Ar	110.31±0.59	Ghazi et al., 2003
		amphibolite	hornblende Ar-Ar	111.48±1.14	Ghazi et al., 2003
		amphibolite	hornblende Ar-Ar	108.1±0.95	Ghazi et al., 2003
	Neyriz, Iran (SW Sanandaj-Sirjan Zone)	plagiogranite	hornblende Ar-Ar	93.19±2.48	Babaie et al., 2006
			hornblende Ar-Ar	92.07±1.69	Babaie et al., 2006
		plagiogranite	hornblende Ar-Ar	83.6	Lanphere and Pamic, 1983
		diabase	hornblende Ar-Ar	85.9	Lanphere and Pamic, 1983
		diabase	hornblende Ar-Ar	104	Lanphere and Pamic, 1983
		diabase	hornblende Ar-Ar	76.8	Lanphere and Pamic, 1983
		biotite schist in grnet amphibolite	hornblende K-Ar	89±7	Haynes and Reynolds, 1980
		psammitic layer	biotite Ar-Ar	98±1.2	Haynes and Reynolds, 1980
		psammitic layer	muscovite Ar-Ar	96±1.3	Haynes and Reynolds, 1980
	Seghina, Zagros belt, Iran	blueschist	phengite Ar-Ar	80.2±0.09	Monie and Agard, 2009
			phengite Ar-Ar	85.4±0.9	Monie and Agard, 2009
	Seghina unit, Zagros, Iran	blueschist	Rb-Sr isochron	70.7±3.3	Moghadam et al., 2017
		blueschist	Rb-Sr isochron	90.1±3.4	Moghadam et al., 2017
		blueschist	Rb-Sr isochron	84.3±5.5	Moghadam et al., 2017
		blueschist	Rb-Sr isochron	88.5±1.5	Moghadam et al., 2017
	Ashin, Zagros, Iran	blueschist	phengite Ar-Ar	97.2±1.3	Monie and Agard, 2009
		blueschist	phengite Ar-Ar	98.2±1.1	Monie and Agard, 2009
		blueschist	phengite Ar-Ar	98.2±1	Monie and Agard, 2009
		blueschist	phengite Ar-Ar	105.6±1.3	Monie and Agard, 2009
		blueschist	phengite Ar-Ar	98.8±1	Monie and Agard, 2009
		blueschist	phengite Ar-Ar	93.3±1	Monie and Agard, 2009
		blueschist	phengite Ar-Ar	102.3±1.1	Monie and Agard, 2009
		blueschist	phengite Ar-Ar	98.7±1.1	Monie and Agard, 2009
		blueschist	phengite Ar-Ar	100.3±1	Monie and Agard, 2009
		blueschist	phengite Ar-Ar	105.7±1.1	Monie and Agard, 2009
		blueschist	phengite Ar-Ar	100.5±1.1	Monie and Agard, 2009
		blueschist	phengite Ar-Ar	104.1±1	Monie and Agard, 2009
	Ashin, Zargro-Makran, Iran	garnet mica schist	Rb-Sr isochron	92.6±3.7	Moghadam et al., 2017
		greenschist	Rb-Sr isochron	129.9±6.6	Moghadam et al., 2017
		greenschist	Rb-Sr isochron	126.3±3.2	Moghadam et al., 2017
	Sargaz-Abshour, Makran, Iran	amphibolite	Rb-Sr isochron	144±4	Moghadam et al., 2017
	Band Ziarat, Makran, SE Iran	hornblende gabbro	hornblende K-Ar	146±5	Hassanipak et al., 1996
		hornblende gabbro	hornblende K-Ar	134±4	Hassanipak et al., 1996
		pegmatitic hornblende gabbro	hornblende K-Ar	124±4	Hassanipak et al., 1996
		pegmatitic hornblende gabbro	hornblende K-Ar	130±4	Hassanipak et al., 1996
		pegmatitic hornblende gabbro	hornblende K-Ar	121±4	Hassanipak et al., 1996
		olivine gabbro	whole-rock K-Ar	136±5	Hassanipak et al., 1996
		olivine gabbro	whole-rock K-Ar	136±4	Hassanipak et al., 1996
		diabase	whole-rock K-Ar	98±2	Hassanipak et al., 1996
		diabase	whole-rock K-Ar	86±2	Hassanipak et al., 1996
		gabbro	hornblende Ar-Ar	141.7±1.0	Ghazi et al., 2004
		gabbro	hornblende Ar-Ar	140.7±2.2	Ghazi et al., 2004
		gabbro	hornblende Ar-Ar	142.9±3.5	Ghazi et al., 2004
	Makran, SE Iran	tuff layer	zircon U-Pb, LA-ICP-MS	95.4±2.1	Esmaeili et al., 2019
	Semail, Oman	amphibolite	hornblende Ar-Ar	94±1.1	Searle and Cox, 1999
		plagiogranite	zircon U-Pb, TIMS	96.9±0.5	Tilton et al. (1981)
		plagiogranite	zircon U-Pb, TIMS	94.7±0.5	Tilton et al. (1981)
		plagiogranite	zircon U-Pb, TIMS	94.6±0.5	Tilton et al. (1981)
		plagiogranite	zircon U-Pb, TIMS	95.4±0.5	Tilton et al. (1981)
		plagiogranite	zircon U-Pb, TIMS	93.5±0.5	Tilton et al. (1981)
		plagiogranite	zircon U-Pb, TIMS	95.4±0.5	Tilton et al. (1981)
		plagiogranite	zircon U-Pb, TIMS	94.7±0.5	Tilton et al. (1981)
		plagiogranite	zircon U-Pb, TIMS	97.3±0.5	Tilton et al. (1981)
		plagiogranite	zircon U-Pb, TIMS	94.9±0.5	Tilton et al. (1981)
		plagiogranite	zircon U-Pb, TIMS	94.7±0.5	Tilton et al. (1981)
		plagiogranite	zircon U-Pb, TIMS	94.8±0.5	Tilton et al. (1981)
		plagiogranite	zircon U-Pb, TIMS	94.8±0.5	Tilton et al. (1981)
		plagiogranite	zircon U-Pb, TIMS	94.5±0.5	Tilton et al. (1981)
		gabbro, plagiogranite	hornblend Ar-Ar	94.4±0.3	Hacker et al., 1996
		diabase dike in amphibolite	hornblend Ar-Ar	93.7±0.8	Hacker et al., 1996
		metamorphic sole	hornblend Ar-Ar	94.9±0.2	Hacker et al., 1996
		metamorphic sole	muscovite Ar-Ar	92.4±0.2	Hacker et al., 1996
		trondhjemite	TIMS zircon U-Pb	95.3±0.19	Warren et al.,2005
		trondhjemite	TIMS zircon U-Pb	94.37±0.18	Warren et al.,2005
		trondhjemite	TIMS zircon U-Pb	95.5±0.24	Warren et al.,2005
		trondhjemite	TIMS zircon U-Pb	95.16±0.2	Warren et al.,2005
		amphibolite, metamorphic sole	TIMS zircon U-Pb	94.48±0.23	Warren et al.,2005
		metamorphic sole	zircon U-Pb	96.19±0.14	Guilmette et al., 2018
		metamorphic sole	titanite U-Pb	95.6±0.27	Guilmette et al., 2018
		metamorphic sole	Garnet-whole rock Lu-Hf isochron	103.5±1.6	Guilmette et al., 2018
		metamorphic sole	Garnet-whole rock Lu-Hf isochron	104.1±1.1	Guilmette et al., 2018
		metamorphic sole	Garnet-whole rock Lu-Hf isochron	103.2±1.2	Guilmette et al., 2018
		gabbro, tonalite, trondhjemite	zircon U-Pb	96.441±0.062	Rioux et al., 2013
		gabbro, tonalite, trondhjemite	zircon U-Pb	95.478±0.056	Rioux et al., 2013
		gabbro, tonalite, trondhjemite	zircon U-Pb	95.405±0.062	Rioux et al., 2013
		gabbro, tonalite, trondhjemite	zircon U-Pb	95.077±0.062	Rioux et al., 2013
		trondhjemite in metamorphic sole	zircon U-Pb	94.9±0.38	Rioux et al., 2013
		trondhjemite in metamorphic sole	zircon U-Pb	94.69±0.12	Rioux et al., 2013
	Wadi Tayin, Oman	gabbro, tonalite, trondhjemite	zircon U-Pb	96.4±0.17	Rioux et al., 2012
		gabbro, tonalite, trondhjemite	zircon U-Pb	95.5±0.17	Rioux et al., 2012
	Sumeini, Oman	diorite in metamorphic sole	zircon U-Pb	96.169±0.02	Rioux et al., 2016
			zircon U-Pb	96.146±0.035	Rioux et al., 2016
	Fizh massif, Oman	gabbro	zircon U-Pb	95.786±0.027	Rioux et al., 2016
	Fizh massif, Oman	gabbro	zircon U-Pb	96.033±0.04	Rioux et al., 2016
	Sarami, Oman	gabbro	zircon U-Pb	96.03±0.12	Rioux et al., 2016
	Khawr Fakkan, United Arab Emirates	gabbro	zircon U-Pb	95.568±0.043	Rioux et al., 2016
	Aswad massif, United Arab Emirates	gabbro	zircon U-Pb	95.742±0.041	Rioux et al., 2016
	Bela, Pakistan	metamorphic sole	amphibole Ar-Ar	69.5 ±0.7	Gnos et al., 1998
	Bela, Pakistan	metamorphic sole	amphibole Ar-Ar	68.7 ±0.7	Gnos et al., 1998
	Muslim Bagh, Pakistan	plagiogranite	zircon U-Pb	80.2 ± 1.5	Kakar et al., 2012
	Muslim Bagh, Pakistan	metamorphic sole	amphibole Ar-Ar	65.8 ± 5.7	Mahmood et al., 1995
	Muslim Bagh, Pakistan	metamorphic sole	amphibole Ar-Ar	68.7 ±1.8	Mahmood et al., 1995
	Muslim Bagh, Pakistan	alkaline basalt	amphibole Ar-Ar	73.4 ±1.8	Kerr et al., 2010
	Muslim Bagh, Pakistan	alkaline basalt	amphibole Ar-Ar	69.7 ±1.8	Mahoney et al., 2002
	Muslim Bagh, Pakistan	dolerite	amphibole Ar-Ar	81.4 ±5.5	Sawada et al., 1995
	Muslim Bagh, Pakistan	dolerite	amphibole Ar-Ar	80.9 ±3.5	Sawada et al., 1995
	Muslim Bagh, Pakistan	gabbro	amphibole Ar-Ar	67±4	Sawada et al., 1995
	Waziristran-Khost, Afghanistan	metamorphic Soles	amphibole Ar-Ar	96-90	Robinson et al., 2000
	Jajil, Pakistan	gabbro	zircon U-Pb	98.9 ± 0.4	Schaltegger et al., 2002
	Jajil, Pakistan	granite	zircon U-Pb	97.1 ± 0.2	Schaltegger et al., 2002
	Jajil, Pakistan	diorite	zircon U-Pb	91.8 ± 1.4	Schaltegger et al., 2002
	Sapat, Pakistan	gabbro dike	zircon U-Pb	98.8 ± 0.7	Bouilhol et al., 2013
	Sapat, Pakistan	gabbro dike	zircon U-Pb	98.9 ± 0.3	Bouilhol et al., 2013
	Sapat, Pakistan	gabbro dike	zircon U-Pb	103.8 ± 0.6	Bouilhol et al., 2013
	Sapat, Pakistan	gabbro dike	zircon U-Pb	104.4 ± 0.8	Bouilhol et al., 2013
	Sapat, Pakistan	gabbro dike	zircon U-Pb	104.7 ± 0.1	Bouilhol et al., 2013
	Sapat, Pakistan	gabbro dike	zircon U-Pb	95.0 ± 0.1	Bouilhol et al., 2013
	Dras, Pakistan	granodiorite	zircon U-Pb	102.8 ± 3.2	Honegger et al., 1982
	Dras, Pakistan	granodiorite	zircon U-Pb	101± 2	Scharer et al., 1984
	Spontang, India	dacite	zircon U-Pb	88 ± 5	Pederson et al., 2001
	Spontang, India	basalt	amphibole Ar-Ar	101.7 ± 1.2	Catlos et al., 2019
	Spontang, India	dyke	amphibole Ar-Ar	98.4± 2.3	Catlos et al., 2019
	Spontang, India	basalt	zircon U-Pb	119± 3	Catlos et al., 2019
	Spontang, India	diorite	hornblende, Ar-Ar	124±1	Mahéo et al., 2004
	Nidar	gabbro	hornblende, Ar-Ar	124±1	Mahéo et al., 2004
		leucogabbro	zircon U-Pb, SHRIMP	135.9±1.2	Buckman et al., 2018
		gabbro	zircon U-Pb, SHRIMP	133.3±9.1	Buckman et al., 2018
	Daba/Dongbo/Koigar, Zanda	pyroxenite	zircon U-Pb, LA-ICP-MS	130±0.5	Xiong et al., 2011
		gabbro	zircon U-Pb, LA-ICP-MS	128±1.1	Xiong et al., 2011
		dolerite	zircon U-Pb, LA-ICP-MS	120.6±1.7	Cheng et al., 2018
		dolerite	zircon U-Pb, LA-ICP-MS	125.4±2.1	Cheng et al., 2018
	Baer/Jianabeng/Cuobuzha	amphibole gabbro	zircon U-Pb, SHRIMP	128.1±2.1	Liu et al., 2015b
		gabbro	zircon U-Pb, LA-ICP-MS	127.0±0.46	Liu et al., 2015c
		dolerite	zircon U-Pb, LA-ICP-MS	125.8±2.6	Liu et al., 2015c
		dolerite	zircon U-Pb, LA-ICP-MS	122.1±0.5	Liu et al., 2018
		dolerite	zircon U-Pb, LA-ICP-MS	124.8±1.4	Liu et al., 2018
		microgabbro dike	zircon U-Pb, LA-ICP-MS	128.2±1.4	Liu et al., 2018
	Burang (Purang)	diabase	zircon U-Pb, SHRIMP	120.2±2.3	Li et al., 2008
		diabase	zircon U-Pb, SHRIMP	120.5±1.9	Xia et al., 2011
		gabbro	zircon U-Pb, LA-ICP-MS	130±3	Liu et al., 2011
		gabbronorite	zircon U-Pb, LA-ICP-MS	123.42±0.85	Chan et al., 2015
		gabbro	zircon U-Pb, LA-ICP-MS	123.87±0.85	Chan et al., 2015
		diabase	zircon U-Pb, SHRIMP	118.8±1.8	Xia et al., 2011
		gabbro	zircon U-Pb, LA-ICP-MS	144.2±2.1	Xiong et al., 2020
		dolerite	zircon U-Pb, LA-ICP-MS	127.9±2.3	Xiong et al., 2020
		microgabbro	zircon U-Pb, LA-ICP-MS	126.5±1.4	Xiong et al., 2020
	Dangqiong/	gabbro	zircon U-Pb, TIMS	126.69±0.4	Chan et al., 2015
	Xiugugabu	gabbro	zircon U-Pb, TIMS	123.43±0.84	Chan et al., 2015
		diabase	zircon U-Pb, SHRIMP	122.3±2.4	Wei et al., 2006
		diabase	zircon U-Pb, SHRIMP	122.3±2.5	Xia et al., 2011
		gabbro-diabase	Sm-Nd isochron	126.2±9.1	Xu et al., 2008
	Zhongba	diabase	zircon U-Pb, SIMS	125.7±0.9	Dai et al.,2012
	Saga	foliated amphibolite	hornblende, Ar-Ar	123.5±1	Guilmette et al., 2012
		foliated amphibolite	hornblende, Ar-Ar	127.9±2.5	Guilmette et al., 2012
		foliated amphibolite	hornblende, Ar-Ar	127.8±2.6	Guilmette et al., 2012
		foliated amphibolite	hornblende, Ar-Ar	128.9±1.3	Guilmette et al., 2012
	Sangsang	diabase	zircon U-Pb, SIMS	125.2±3.4	Xia et al., 2008b
	Ngamring (Xigaze)	amphibolite	hornblende, Ar-Ar	127.7±2.2	Guilmette et al., 2009
	Lhaze (Xigaze)	garnet clinopyroxenite	zircon U-Pb, SIMS	125.5±5.4	Zhang et al., 2019
		amphibolite	zircon U-Pb, SIMS	123.8±2.2	Zhang et al., 2019
		amphibolite	zircon U-Pb, SIMS	124.7±1.5	Zhang et al., 2019
	Jiding (Xigaze)	gabbro	zircon U-Pb, SIMS	125.6±1.7	T. Liu et al., 2016
		gabbro	zircon U-Pb, SIMS	125.6±1.6	T. Liu et al., 2017
		gabbro	zircon U-Pb, LA-ICP-MS	127.1±3.5	Dai et al., 2013
		pegmatitic gabbro	zircon U-Pb, LA-ICP-MS	131.8±1.3	Chan et al., 2015
		gabbro	zircon U-Pb, SHRIMP	128±2.0	Wang et al., 2006
		gabbro	zircon U-Pb, LA-ICP-MS	128.5±1.0	Bao et al., 2013
	Kulong (Xigaze)	gabbro	zircon U-Pb, LA-ICP-MS	137.8±1.9	Wang et al., 2017
	Xialu/Qunrang/Chongdui (Xigaze)	rodingite	zircon U-Pb, SIMS	125.6±0.8	T. Liu et al., 2016
		gabbro	zircon U-Pb, SHRIMP	125.6±0.9	Li et al., 2009
		gabbro	zircon U-Pb, SIMS	129.1±1.2	T. Liu et al., 2016
	Deji (Xigaze)	dolerite sheeted dike	zircon U-Pb, LA-ICP-MS	126.5±4.7	Dai et al., 2013
		dolerite dike	zircon U-Pb, LA-ICP-MS	124.9±1.1	Dai et al., 2013
		quartz diorite	zircon U-Pb, LA-ICP-MS	123.3±1.5	Dai et al., 2013
		gabbro	zircon U-Pb, SIMS	125.7±1.3	Zhang et al., 2016
		gabbro	zircon U-Pb, SIMS	124.6±1.4	Zhang et al., 2016
		plagiogranite	zircon U-Pb, SIMS	124.7±1.9	Zhang et al., 2016
		plagiogranite	zircon U-Pb, SIMS	127.1±1.0	Zhang et al., 2016
	Pengcang (Xigaze)	gabbro	zircon U-Pb, SIMS	126±3.0	Zhang et al., 2016
		rodingite	zircon U-Pb, SIMS	130.5±1.3	Zhang et al., 2016
		plagiogranite	zircon U-Pb, SIMS	129.6±1.5	Zhang et al., 2016
	Bainang (Xigaze)	gabbro, dolerite, lava	Pb-Pb isochron	120.0±10.0	Göpel et al., 1984
		amphibolite	hornblende, Ar-Ar	123.6±2.9	Guilmette et al., 2009
		amphibolite	hornblende, Ar-Ar	127.4±2.3	Guilmette et al., 2009
	Dazhuqu (Xigaze)	troctolite	zircon U-Pb, SIMS	124.4±1.3	T. Liu et al., 2016
		gabbro	zircon U-Pb, SIMS	126.2±1.0	T. Liu et al., 2016
		gabbro	zircon U-Pb, SIMS	127.6±1.0	T. Liu et al., 2016
		gabbro	zircon U-Pb, SIMS	124.2±1.3	T. Liu et al., 2016
		rodingite	zircon U-Pb, SIMS	125.9±1.2	T. Liu et al., 2016
		quartz diorite	zircon U-Pb, SHRIMP	126±1.5	Malpas et al., 2003
		dolerite dike	zircon U-Pb, LA-ICP-MS	126.1±1.3	Dai et al., 2013
	Zedong	hornblende andesite	hornblende, Ar-Ar	127.91±0.33	Malpas et al., 2003
	(Zedang)	rodingite	zircon U-Pb, SIMS	131.4±1.1	Zhang et al., 2014; T. Liu et al., 2016
		rodingite	zircon U-Pb, SIMS	130.3±1.2	Zhang et al., 2014; T. Liu et al., 2016
		gabbro	zircon U-Pb, SIMS	131.7±0.9	Zhang et al., 2014; T. Liu et al., 2016
		plagiogranite	zircon U-Pb, SIMS	137.8±1.0	Zhang et al., 2014; T. Liu et al., 2016
		dolerite	zircon U-Pb, LA-ICP-MS	130±1	Xiong et al., 2016
		dolerite	zircon U-Pb, LA-ICP-MS	128±2	Xiong et al., 2016
	Luobusa	gabbro dyke in mantle peridotite	zircon U-Pb, SIMS	128.4±0.9	Zhang et al., 2016
		amphibolite	zircon U-Pb, SIMS	131±1.2	Zhang et al., 2016
		amphibolite	titanite U-Pb, LA-ICPMS	131.5±6.9	Zhang et al., 2016
		amphibolite	titanite U-Pb, LA-ICPMS	131.3±3.3	Zhang et al., 2016
		amphibolite	titanite U-Pb, LA-ICPMS	133.9±3.1	Zhang et al., 2016
	Kalaymyo, Myanmar	rodingite	zircon U-Pb, SIMS	126.6±1.0	C.Z. Liu et al., 2016
		rodingite	zircon U-Pb, SIMS	125.8±1.7	C.Z. Liu et al., 2016
		amphibolite, Metamorphic Soles	zircon U-Pb, SIMS	114.7±1.4	C.Z. Liu et al., 2016
		amphibolite, Metamorphic Soles	zircon U-Pb, LA-ICPMS	119±3	J. E. Zhang et al., 2017
		Gabbro	zircon U-Pb, LA-ICPMS	131±2	J. E. Zhang et al., 2018
		Granite	zircon U-Pb, LA-ICPMS	128±1	J. E. Zhang et al., 2019
		Gabbro	zircon U-Pb, LA-ICPMS	133±2	J. E. Zhang et al., 2020
	Wuntho, Myanmar	basaltic andesite	zircon U-Pb, LA-ICPMS	105.7±0.4	This study
		basaltic andesite	zircon U-Pb, LA-ICPMS	103.1±4.2	This study
		gabbro	zircon U-Pb, LA-ICPMS	93.7±0.3	This study
		andesite	zircon U-Pb, LA-ICPMS	93.5±2.4	This study
	Salingyi, Myanmar	rhyolite	zircon U-Pb, LA-ICPMS	100.6 ±0.4	This study
	Andaman	plagiogranite	Zircon U-Pb	93.6±1.3	Sarma et al., 2010
		trondhjemite	Zircon U-Pb	95±2	Pederson et al., 2010
		tonalite	Zircon U-Pb	94±1	Pederson et al., 2010
		amphibolite, Metamorphic Soles	amphibole Ar-Ar	106.4±2.1	Plunder et al., 2020
		amphibolite, Metamorphic Soles	amphibole Ar-Ar	105.3±1.6	Plunder et al., 2020
	Wolya arc	granite	zircon U-Pb	102±1	S. Li et al., 2020
	Wolya arc	granodiorite	zircon U-Pb	102±1	S. Li et al., 2020
	Wolya arc	granite	zircon U-Pb	98±2	S. Li et al., 2020
	Wolya arc	granite	zircon U-Pb	85±1	S. Li et al., 2020
	Wolya arc	granite	zircon U-Pb	85±1	S. Li et al., 2020
	Wolya arc	granite	zircon U-Pb	84±1	S. Li et al., 2020
	References:
	Ali, S.A., Buckman, S., Aswad, K.J., Jones, B.G., Ismail, S.A., and Nutman, A.P., 2012, Recognition of Late Cretaceous Hasanbag ophiolite-arc rocks in the Kurdistan Region of the Iraqi Zagros suture zone, A missing link in the paleogeography of the closing Neotethys Ocean: Lithosphere v. 4, p. 395–410, http://doi:10.1130/L207.1
	Babaie, H.A., Babaei, A., Ghazi, A.M., and Arvin, M., 2006, Geochemical, 40Ar/39Ar age, and isotopic data for crustal rocks of the Neyriz ophiolite, Iran: Canadian Journal of Earth Science, v. 43, p. 57–70, http://doi:10.1139/e05-111
	Bao, P.S., Su, L., Wang, J., and Zhai, Q.G., 2013, Study on the tectonic setting for the ophiolites in Xigaze, Tibet: Acta Geologica Sinica (English Edition), v. 87, p. 395–425, http://doi:10.1111/1755-6724.12058
	Bao, P.S., Su, L., Wang, J., Zhai, Q.G., 2014, Origin of the Zedang and Luobusa ophiolites, Tibet: Acta Geologica Sinica (English Edition), v. 88, p. 669–698, http://doi:10.1111/1755-6724.12222
	Bezard, R., Hébert, R., Wang, C.S., Dostal, J., Dai, J.G., and Zhong, H.T., 2011, Petrology and geochemistry of the Xiugugabu ophiolitic massif, western Yarlung Zangbo suture zone, Tibet: Lithos, v. 125, p. 347–367, http://doi:10.1016/j.lithos.2011.02.019
	Bouilhol, P., Jagoutz, O., Hanchar, J. M., and Dudas, F. O., 2013, Dating the India–Eurasia collision through arc magmatic records: Earth and Planetary Science Letters, v. 366, p. 163–175, http://doi:10.1016/j.epsl.2013.01.023
	Buckman, S., Aitchison, J.C., Nutman, A.P., Bennett, VC., Saktura, W.M., Walsh, J.M.J. Kachovich, S., and Hidaka, H., 2018, The Spongtang massif in Ladakh, NW Himalaya: An early Cretaceous record of spontaneous, intra-oceanic subduction initiation in the Neotethys: Gondwana Research, v. 63, p. 226–249, http://doi: 10.1016/j.gr.2018.07.003
	Catlos, E.J., Pease, E.C., Dygert, N., Brookfield, M., Schwarz, W.H., Bhutani, R., Pande, K., Schmitt, A.K., 2019, Nature, age and emplacement of the Spongtang ophiolite, Ladakh, NW India: Journal of the Geological Society, v. 176, p. 284–305, http://doi: 10.1144/jgs2018-085
	Celik, Ö.F., Delaloye, M., and Feraud, G., 2006, Precise 40Ar-39Ar ages from the metamorphic sole rocks of the Tauride Belt Ophiolites, southern Turkey, implications for the rapid cooling history: Geological Magazine, v. 143, p. 213–227, http://doi: 10.1017/S0016756805001524
	Chan, G.H.N., Aitchison, J.C., Crowley, Q.G., Horstwood, M.S.A., Searle, M.P, Parrish, R.R., and Chan, J.S.L., 2015, U-Pb zircon ages for Yarlung Tsangpo suture zone ophiolites, southwestern Tibet and their tectonic implications: Gondwana Research, v. 27, p. 719–732, http://doi: 10.1016/j.gr.2013.06.016
	Chan, G.H.N., Malpas, J., Xenophontos, C., and Lo, C.H., 2007, Timing of subduction zone metamorphism during the formation and emplacement of Troodos and Baer-Bassit ophiolites, insights from 40Ar-39Ar geochronology: Geological Magazine, v. 144, p. 797–810, http://doi:10.1017/s0016756807003792
	Chen, G.W., Xia, B., Zhong, Z.H., Wang, G.Q., Wang, H., Zhao, T.P., Wang, J.C., Qi, L., and Li, S.R., 2003, Geochemical characteristics and geological significance of boninites in the Deji ophiolite, Tibet: Acta Mineralogica Sinica, v. 23, p. 91–96.
	Cheng, C., Zheng, H., Kapsiotis, A., Liu, W.L., Lenaz, D., Velicogna, M., Zhong, L.F., Huang, Q.T., Yuan, Y.J., and Xia, B., 2018, Geochemistry and geochronology of dolerite dykes from the Daba and Dongbo peridotite massifs, SW Tibet: Insights into the style of mantle melting at the onset of Neo-Tethyan subduction: Lithos, v. 322, p. 281–295. http://doi:10.1016/j.lithos.2018.10.023
	Dai, J.G., Wang, C.S., and Li, Y.L., 2012. Relicts of the Early Cretaceous seamounts in the central-western Yarlung Zangbo Suture Zone, southern Tibet: Journal of Asian Earth Sciences, v. 53, p. 25–37, http://doi:10.1016/j.jseaes.2011.12.024
	Dai, J., Wang, C., Polat, A., Santosh, M., Li, Y., and Ge, Y., 2013, Rapid forearc spreading between 130 and 120 Ma: Evidence from geochronology and geochemistry of the Xigaze ophiolite, southern Tibet: Lithos, v. 172–173, p. 1–16, http://doi:10.1016/j.lithos.2013.03.011
	Davoudian, A.R., Genser, J., Neubauer, F., and Shabanian, N., 2016, 40Ar/39Ar mineral ages of eclogites from North Shahrekord in the Sanandaj-Sirjan Zone, Iran: Implications for the tectonic evolution of Zagros orogen: Gondwana Research, v. 37, p. 216–240, http://doi:10.1016/j.gr.2016.05.013
	Dilek, Y., Thy, P., Hacker, B., and Grundvig, S., 1999, Structure and petrology of Tauride ophiolites and mafic dike intrusions (Turkey): Implications for the Neotethyan ocean: Geological Sociey of America Bulletin, v. 111, p. 1192–1216, http://doi:10.1130/0016-7606(1999)111<1192:sapoto>2.3.co;2
	Dilek, Y., Furnes, H., and Shallo, M., 2007, Suprasubduction zone ophiolite formation along the periphery of Mesozoic Gondwana: Gondwana Research, v. 11, p. 453–475, http://doi:10.1016/j.gr.2007.01.005
	Dilek, Y., and Thy, P., 2006, Age and petrogenesis of plagiogranite intrusions in the Ankara mélange, central Turkey: Island Arc, v. 15, p. 44–57, http://doi:10.1111/j.1440-1738.2006.00522.x
	Dilek, Y., and Thy, P., 2009, Island arc tholeiite to boninitic melt evolution of the Cretaceous Kizildag (Turkey) ophiolite: Model for multi-stage early arc-forearc magmatism in Tethyan subduction factories: Lithos, v. 113, p. 68–87, http://doi:10.1016/j.lithos.2009.05.044
	Esmaeili, R., Xiao, W.J., Ebrahimi, M., Zhang, J.E, Zhang, Z.Y, El-Rahman, Y.A., Han, C.M., Wan, B., Ao, S.J., Song, D.F., Shahabi, S., and Aouizerat, A., 2019, Makran ophiolitic basalts (SE Iran) record Late Cretaceous Neotethys plume-ridge interaction: International Geology Review, http://doi.org/10.1080/00206814.2019.1658232
	Fornash, K.F., Cosca, M.A., and Whitney, D.L., 2016, Tracking the timing of subduction and exhumation using 40Ar/39Ar phengite ages in blueschist- and eclogite-facies rocks (Sivrihisar, Turkey): Contributions to Mineralogy and Petrology, v. 171, no.67. http://doi: 10.1007/s00410-016-1268-2
	Ghazi, A.M., Hassanipak, A.A., Mahone,Y.J.J., and Duncan, R.A., 2004, Geochemical characteristics, 40Ar/39Ar ages and original tectonic setting of the Band-e-Zeyarat/Dar Anar ophiolite, Makran accretionary prism, S.E. Iran: Tectonophysics, v. 393, p. 175–196, http://doi.10.1016/j.tecto.2004.07.035
	Ghazi, A.M., Pessagno, E.A., Hassanipak, A.A., Kariminia, S.M., Duncan, R.A., and Babaie, H.A., 2003, Biostratigraphic zonation and 40Ar-39Ar ages for the Neotethyan Khoy ophiolite of NW Iran: Palaeogeography, Palaeoclimatology, Palaeoecology, v. 193, p. 311–323, http://doi.10.1016/s0031-0182(03)00234-7
	Gnos, E., Khan, M., Mahmood, K. Khan, A. S. Shafique, N. A. and Villa, I. M., 1998, Bela oceanic lithosphere assemblage and its relation to the Réunion hotspot: Terra Nova, v. 10, p. 90–95, http://doi.10.1046/j.1365-3121.1998.00173.x
	Göpel, C., Allègre, C.J., and Xu, R.H., 1984, Lead isotopic study of the Xigaze ophiolite (Tibet), the problem of the relationship between magmatites (gabbros, dolerites, lavas) and tectonites (harzburgites): Earth and Planetary Science Letters, v. 69, p. 301–310, http://doi: 10.1016/0012-821x(84)90189-4
	Gücer, M.A., and Aslan, Z., 2014, 40Ar-39Ar age, petrography and geochemistry of the Yoncayolu metamorphic rocks (NE Turkey), subduction-related metamorphism under greenschist facies conditions: Jounal of Mineralogy and Geochemistry, v. 191, p. 257–276, http://doi:10.1127/0077-7757/2014/0260
	Guilmette, C., Hébert, R., Dostal, J., Indares, A., Ullrich, T., Bédard, É., and Wang, C., 2012, Discovery of a dismembered metamorphic sole in the Saga ophiolitic mélange, South Tibet: Assessing an Early Cretaceous disruption of the Neo-Tethyan supra-subduction zone and consequences on basin closing: Gondwana Research, v. 22, p. 398–414, http://doi:10.1016/j.gr.2011.10.012
	Guilmette, C., Hébert, R., Wang, C.S., and Villeneuve, M., 2009, Geochemistry and geochronology of the metamorphic sole underlying the Xigaze ophiolite, Yarlung Zangbo Suture Zone, South Tibet: Lithos, v. 112, p. 149–162, http://doi:10.1016/j.lithos.2009.05.027
	Guilmette, C., Smit, M. A., van Hinsbergen, D. J. J., Gürer, D., Corfu, F., Charette, B., Maffione, M., Rabeau, O., Savard, D., 2018, Forced subduction initiation recorded in the sole and crust of the Semail Ophiolite of Oman: Nature Geoscience, v. 11, p. 688–695, http://doi:10.1038/s41561-018-0209-2
	Hacker, B.R., Mosenfelder, J.L., and Gnos, E., 1996, Rapid emeplacement of the Oman ophiolite, Thermal and geochronologic constraints: Tectonics, v. 15, p. 1230–1247, http://doi:10.1029/96tc01973
	Hassanipak, A.A., Ghazi, A.M., and Wampler, J.M., 1996, Rare earth element characteristics and K-Ar ages of the Band Ziarat ophiolite complex, southeastern Iran: Canadian Journal of Earth Sciences, v. 33, p. 1534–1542
	Hässig, M., Rolland, Y., Sosson, M., Galoyan, G., Müller, C., Avagyan, A., and Sahakyan, L., 2013, New structural and petrological data on the Amasia ophiolites (NW Sevan-Akera suture zone, Lesser Caucasus), Insights for a large-scale obduciton in Armenia and NE Turkey: Tectonophysics, v. 588, p. 135–153, http://doi: 10.1016/j.tecto.2012.12.003
	Hässig, M., Rolland, Y., Melis, R., Sosson, M., Galoyan, G., and Bruguier, O., 2019, P-T-t History of the Amasia and Stepanavan Sub-Ophiolitic Metamorphic Units (Nw Armenia, Lesser Caucasus), Implications for Metamorphic Sole Development and for the Obduction Process: Ofioliti, v. 44, p. 43–70, http://doi: 10.4454/ofioliti.v44i1.464
	Haynes, S. J., and Reynolds, P. H., 1980, Early development of Tethys and Jurassic ophiolite displacement: Nature, v. 283, no. 5747, p. 561-563, http://doi.10.1038/283561a0
	He, J., Li, Y.L., Wang, C.S., Dilek, Y., Wei ,Y.S., Zhou, A., 2016, Plume-proximal mid-ocean ridge origin of Zhongba mafic rocks in the western Yarlung Zangbo suture zone, Southern Tibet: Journal of Asian Earth Sciences, v. 121, p. 34–55, http://doi: 10.1016/j.jseaes.2016.01.022
	Honegger, K., Dietrich, V., Frank, W., Gansser, A., Thöni, M., and Trommsdorff, V., 1982, Magmatism and metamorphism in the Ladakh Himalayas (the Indus-Tsangpo suture zone): Earth and Planetary Science Letters, v. 60, p. 253–292, http://doi: 10.1016/0012-821X(82)90007-3
	Kakar, M.I., Collins, A.S., Mahmood, K., Foden, J.D., and Khan, M., 2012, U-Pb zircon crystallization age of the Muslim Bagh ophiolite, Enigmatic remains of an extensive pre-Himalayan arc: Geology, v. 40, p. 1099–1102, http://doi: 10.1130/G33270.1
	Karaoglan, F., Parlak, O., Klӧtzli, U., Thӧni, M., and Koller, F., 2012, U-Pb and Sm-Nd geochronology of the Kizildag (Hatay, Turkey) ophiolite, implications for the timing and duration of suprasubduction zone type oceanic crust formation in the southern Neotethys: Geological Magazine, v. 150, p. 283–299, http://doi: 10.1017/S0016756812000477
	Kerr, A.C., Khan, M., Mahoney, J.J., Nicholson, K.N., and Hall, C.M., 2010, Late Cretaceous alkaline sills of the south Tethyan suture zone, Pakistan, initial melts of the Réunion hotspot: Lithos, v. 117, p. 161–171, http://doi: 10.1016/j.lithos.2010.02.010
	Lanphere, M.A., and Pamic, J., 1983, 40Ar/39Ar ages and tectonic setting of ophiolite from the Neyriz area, southeast Zagros Range, Iran: Tectonophysics, v. 96, p. 245–256, http://doi: 10.1016/0040-1951(83)90220-2
	Li, J.F., Xia, B., Liu, L.W., Xu, L.F., He, G.S., Wang, H., Zhang, Y.Q., Yang, Z.Q., 2008, SHRIMP U-Pb zircon dating of diabase in the La’nga Co ophiolite, Burang, Tibet, China, and its geological significance: Geological Bulletin of China, v. 27, p. 1739–1743.
	Li, J.F., Xia, B., Liu, L.W., Xu, L.F., He, G.S., Wang, H., Zhang, Y.Q., Yang, Z.Q., 2009, SHRMIP U-Pb dating for the gabbro in Qunrang ophiolite, Tibet, the geochronology constraint for the development of Eastern Tethys basin: Geotectonica et Metallogenia, v. 33, p. 294–298.
	Li, S., Chung, S.-L., Lai, Y.-M., Ghani, A. A., Lee, H.-Y., and Murtadha, S., 2020, Mesozoic juvenile crustal formation in the easternmost Tethys: Zircon Hf isotopic evidence from Sumatran granitoids, Indonesia: Geology, http://doi.10.1130/g47304.1
	Liu, C.-Z., Chung, S.-L., Wu, F.-Y., Zhang, C., Xu, Y., Wang, J.-G., Chen, Y., Guo, S., 2016, Tethyan suturing in Southeast Asia: Zircon U-Pb and Hf-O isotopic constraints from Myanmar ophiolites: Geology, v. 44, p. 311–314, http://doi:10.1130/g37342.1
	Liu, F., Dilek, Y., Xie, Y.X., Yang, J.S, and Lian, D.Y., 2018, Melt evolution of upper mantle peridotites and mafic dikes in the northern ophiolite belt of the western Yarlung Zangbo suture zone (southern Tibet): Lithosphere, v. 10, p. 109–132, http://doi: 10.1130/L689.1
	Liu, F., Yang, J.S., Dilek, Y., Xu, Z.Q., Xu, X.Z., Liang, F.H., Chen, S.Y., Lian, D.Y., 2015a, Geochronology and geochemistry of basaltic lavas in the Dongbo and Purang ophiolites of the Yarlung-Zangbo Suture zone, Plume-influenced continental margin-type oceanic lithosphere in southern Tibet. Gondwana Research: v. 27, p. 701–718, http://doi: 10.1016/j.gr.2014.08.002
	Liu, F., Yang, J.S., Lian, D.Y., Zhao, H., Zhang, L., Zhang, L., and Huang, J., 2015b, Genesis and characteristics of the western part of the Yarlung Zangbo ophiolites, Tibet: Acta Petrologica Sinica, v. 31, p. 3609–3628
	Liu, F., Yang, J.S., Lian, D.Y., Zhao, H., Zhao, Y.J., and Zhang, L., 2015c, The genesis and tectonic significance of mafic dikes in the western part of the Yarlung Zangbo suture zone, Tibet: Acta Geoscientica Sinica, v. 36, p. 441–454
	Liu, T., Wu, F.Y., Zhang, L.L., Zhai, Q.G., Liu, C.Z., Zhang, C., Xu, Y., 2016, Zircon U-Pb geochronological constraints on rapid exhumation of the mantle peridotite of the Xigaze ophiolite, southern Tibet: Chemical Geology, v. 443, p. 67–86, http://doi: 10.1016/j.chemgeo.2016.09.015
	Liu, Z., Li, Y., Xiong, F.H., Wu, D., and Liu, F., 2011, Petrology and geochronology of MOR gabbro in the Purang ophiolite of western Tibet, China: Acta Petrologica Sinica, v. 27, p. 3269–3279
	Mahoney, J.J., Duncan, R.A., Khan, W., Gnos, E., and McCormick, G.R., 2002, Cretaceous volcanic rocks of the south Tethyan suture zone, Pakistan, implications for the Réunion hotspot and Deccan Traps: Earth and Planetary Science Letters, v. 203, p. 295–310, http://doi: 10.1016/S0012-821X(02)00840-3
	Mahéo, G., Bertrand, H., Guillot, S., Villa, I.M., Keller, F., and Capiez, P., 2004, The South Ladakh ophiolites (NW Himalaya, India), an intra-oceanic tholeiitic arc origin with implication for the closure of the Neo-Tethys: Chemical Geology, v. 203, p. 273–303, http://doi: 10.1016/j.chemgeo.2003.10.007
	Mahmood, K., Boudier, F., Gnos, E., Monié, P., and Nicolas, A., 1995, 40Ar/39Ar dating of the emplacement of the Muslim Bagh ophiolite, Pakistan: Tectonophysics, v. 250, no. 1-3, p. 169-181, http://doi.10.1016/0040-1951(95)00017-5
	Malpas, J., Zhou, M.F., Robinson, P.T., and Reynolds, P.H., 2003, Geochemical and geochronological constraints on the origin and emplacement of the Yarlung Zangbo ophiolites, Southern Tibet, in Dilek, Y., Robinson, P.T, editors, Ophiolites in Earth History. Geological Society, London, Special Publications 218, p. 191–206, http://doi: 10.1144/GSL.SP.2003.218.01.11
	Moghadam, H. S., Brӧcker, M., Griffin, W.L., Li, X.H., Chen, R.X., and O’Reilly, S.Y., 2017, Subduction, high-P metamorphism, and collision fingerprints in South Iran: Constraints from zircon U-Pb and mica Rb-Sr geochronology: Geochemistry, Geophysics, Geysystems, v. 18, p. 306–332, http://doi: 10.1002/2016GC006585
	Monié, P., and Agard, P., 2009, Coeval blueschist exhumation along thousands of kilometers: Implications for subduction channel processes: Geochemistry, Geophysics, Geosystems, v. 10, no. 7, p. n/a-n/a, http://doi.10.1029/2009gc002428
	Mukasa, S.B., Ludden, J.N., 1987, Uranium-lead isotopic ages of plagiogranites from the Troodos ophiolite, Cyprus, and their tectonic significance: Geology, v. 15, p. 825-828
	Önen, A.P., 2003, Neotethyan ophiolitic rocks of the Anatolides of NW Turkey and comparison with Tauride ophiolites: Journal of the Geological Society, London, v. 160, p. 947-962
	Parlak, O., and Delaloye, M., 1999, Precise 40Ar/39Ar ages from the metamorphic sole of the Mersin ophiolite (southern Turkey): Tectonophysics, v. 301, p. 145–158, http://doi: 10.1016/S0040-1951(98)00222-4
	Pedersen, R.B., Searle, M.P., and Corfield, R.I., 2001, U-Pb zircon ages from the Spontang ophiolite, Ladakh Himalaya: Journal of the Geological Society London, v. 158, p. 513–520, http://doi: 10.1144/jgs.158.3.513
	Peng, T.P., 2016, Gerze-Dongcuo ophiolite plagioclase granite geochemical characteristics and zircon U-Pb chronology research in Tibet: Geology of Fujian, v. 4, p. 259–265.
	Plunder, A., Bandyopadhyay, D., Ganerød, M., Advokaat, E. L., Ghosh, B., Bandopadhyay, P., and Hinsbergen, D. J. J., 2020, History of subduction polarity reversal during arc‐continent collision: constraints from the Andaman Ophiolite and its metamorphic sole: Tectonics, http://doi:10.1029/2019tc005762
	Rioux, M., Bowring, S., Kelemen, P., Gordon, S., Dudás, F., and Miller, R., 2012, Rapid crustal accretion and magma assimilation in the Oman-U.A.E. ophiolite, High precision U-Pb zircon geochronology of the gabbroic crust: Journal of Geophysical Research, v. 117, B07201, http://doi: 10.1029/2012JB009273
	Rioux, M., Bowring, S., Kelemen, P., Gordon, S., Miller, R., and Dudás F., 2013, Tectonic development of the Samail ophiolite, High-precision U-Pb zircon geochronology and Sm-Nd isotopic constraints on crustal growth and emplacement: Journal of Geophysical Research-Solid Earth, v. 118, p. 2085–2101, http://doi: 10.1002/jgrb.50139
	Rioux, M., Garber, J., Bauer, A., Bowring, S., Searle, M., Kelemen, P., and Hacker, B., 2016, Synchronous formation of the metamorphic sole and igneous crust of the Semail ophiolite, New constraints on the tectonic evolution during ophiolite formation from high-precision U-Pb zircon geochronology: Earth and Planetary Science Letters, v. 451, p.185–195, http://doi: 10.1016/j.epsl.2016.06.051
	Rolland, Y., Billo, S., Corsini, M., Sosson, M., and Galoyan, G., 2009, Blueschists of the Amassia-Stepanavan Suture Zone (Armenia), linking Tethys subduction history from E-Turkey to W-Iran: International Journal of Earth Science, v. 98, p. 533–550, http://doi: 10.1007/s00531-007-0286-8
	Robinson, J., Beck, R., Gnos, E., and Vincent, R.K., 2000, New structural and stratigraphic insights for northwestern Pakistan from field and Landsat Thematic Mapper data: Geological Society of America Bulletin, v. 112, p. 364–374, http://doi: 10.1130/0016-7606(2000)112<364:NSASIF>2.0.CO;2
	Sawada, Y., Nageo, K., Siddiqui, R.H., and Khan, S.R., 1995, K-Ar ages of the Mesozoic igneous and metamorphic rocks from the Muslim Bagh area, Pakistan: Proceedings of Geoscience Colloquium, Geoscience Laboratory, Islamabad, Geological Survey of Pakistan, v. 12, p. 73–90.
	Sarma, D. S., Jafri, S. H., Fletcher, I. R., and McNaughton, N. J., 2010, Constraints on the tectonic setting of the Andaman ophiolites, Bay of Bengal, India, from SHRIMP U-Pb zircon geochronology of plagiogranite: The Journal of Geology, v. 118, p. 691–697, http://doi:10.1086/656354
	Schaltegger, U., Zeilinger, G., Frank, M., and Burg, J.P., 2002, Multiple mantle sources during island arc magmatism, U–Pb and Hf isotopic evidence from the Kohistan arc complex, Pakistan: Terra Nova, v. 14, p. 461–468, http://doi: 10.1046/j.1365-3121.2002.00432.x
	Schärer, U., Hamet, J., and Allègre, C.J., 1984, The Transhimalaya (Gangdese) plutonism in the Ladakh region, a U-Pb and Rb-Sr study: Earth and Planetary Science Letters, v. 67, p. 327–339, http://doi: 10.1046/j.1365-3121.2002.00432.x
	Searle, M., and Cox, J., 1999, Tectonic setting, origin, and obduction of the Oman ophiolite: Geological Society of America Bulletin, v. 111, p. 104–122, http://doi: 10.1130/0016-7606(1999)111<0104:TSOAOO>2.3.CO;2
	Thuizat, R., Whitechurch, H., Montigny, R., and Juteau, T., 1981, K-Ar dating of some infra-ophiolitic metamorphic soles from the eastern Mediterranean, new evidence for oceanic thrusting before obduction: Earth and Planetary Science Letters, v. 52, p. 302–310, http://doi: 10.1016/0012-821X(81)90185-0
	Tilton, G.R., Hopson, C.A., and Wright, J.E., 1981, Uranium-Lead isotopic ages of the Samail ophiolite, Oman, with applications to Tethyan ocean ridge tectonics: Journal of Geophysical Research, v. 86, p. 2763–2775, http://doi: 10.1029/JB086iB04p02763
	van Hinsbergen, D.J.J., Maffione, M., Plunder, A., Kaymakci, N., Ganerod, M., Hendriks, B.W.H., Corfu, F., Gürer, D., de Gelder, G., Peters, K,. McPhee, P.J., Brouwer, F.M., Advokaat, E.L., Vissers, R.L.M., 2016, Tectonic evolution and paleogeography of the Kirsehir Block and the Central Anatolian Ophiolites, Turkey: Tectonics, v. 35, p. 983–1014, http://doi: 10.1002/2015TC004018
	Wang, R., Xia, B., Zhou, G.Q., Zhang, Y.Q., Yang, Z.Q., Wei, D.L., Zhong, L.F., Xu, L.F., 2006. SHRIMP zircon U-Pb dating for gabbro from the Tiding ophiolite in Tibet: Chinese Science Bulletin, v. 51, p. 1776–1779, http://doi:10.1007/s11434-006-2027-y
	Wang, X.C., Liu, W.L., Zhong, Y., Hu, X.C., Xia, B., and Huang, W., 2017, Geochemical and zircon U-Pb age constraints on the orogin of the Mesozoic Xigaze ophiolite, Yarlung Zangbo suture zone, SW China: International Geology Review, v.60, p. 1267–1289, http://doi: 10.1080/00206814.2017.1385034
	Warren, C.J., Parrish, R.R., Waters, D.J., and Searle, M.P., 2005, Dating the geologic history of Oman’s Semail ophiolite, insights from U-Pb geochronology: Contributions to Mineralogy and Petrology, v. 150, p. 403–422, http://doi: 10.1007/s00410-005-0028-5
	Wei, Z.Q., Xia, B., Zhang, Y.Q., Wang, R., Yang, Z.Q., and Wei, D.L., 2006, SHRIMP zircon dating of diabase in the Xiugugabu ophiolite in Tibet and its geological implications: Geotectonica et Metallogenia, v. 30, p. 93–97.
	Xia, B., Chen, G.W., Wang, R., and Wang, Q., 2008a, Seamount volcanism associated with the Xigaze ophiolite, Southern Tibet: Journal of Asian Earth Sciences, v. 32, p. 396–405, http://doi: 10.1016/j.jseaes.2007.11.008
	Xia, B., Li, J.F., Liu, L.W., Xu, L.F., and He, G.S., 2008b, SHRIMP U-Pb dating for diabase in Sangsang ophiolite, Xizang, China, Geochronological constraint for development of eastern Tethys basin: Geochimica, v. 37, p. 399–403.
	Xia, B., Li, J.F., Xu, L.F., Wang, R., and Yang, Z.Q., 2011, Sensitive High Resolution Ion Microprobe U-Pb zircon geochronology and geochemistry of mafic rocks from the Pulan-Xiangquanhe ophiolite, Tibet, constraints on the evolution of the Neo-tethys: Acta Geologica Sinica, v. 85, p. 840–853.
	Xia, B., Xu, L.F., Wei, Z.Q., Zhang, Y.Q., Wang, R., Li, J.F., and Wang, Y.B., 2008c, SHRIMP zircon dating of gabbro from the Dongqiao ophiolite in Tibet and its geological implications: Acta Geologica Sinica, v. 82, p. 528–531.
	Xia, B., Yu, H.X., Chen, G.W., Qi, L., Zhao, T.P., and Zhou, M.F., 2003. Geochemistry and tectonic environment of the Dagzhuka ophiolite in the Yarlung-Zangbo suture zone, Tibet: Geochemical Journal, v. 37, p. 311–324, http://doi: 10.2343/geochemj.37.311
	Xiong, F.H., Meng, Y.K., Yang, J.S., Liu, Z., Xu, X.Z., Eslami, A., and Zhang, R., 2020, Geochronology and petrogenesis of the mafic dykes from the Purang ophiolite, Implications for evolution of the western Yarlung-Tsangpo suture zone, southwestern Tibet: Geoscience Frontiers, v. 11, p. 277–292, http://doi: 10.1016/j.gsf.2019.05.006
	Xiong, F.H., Yang, J.S., Liang, F.H., Badengzhu, Zhang, J,. Hu, X.Z., Li, Y., Liu, Z., 2011, Zircon U-Pb ages of the Dongbo ophiolite in the western Yarlung Zangbo suture zone and their geological significance: Acta Petrologica Sinica, v. 27, p. 3223–3238.
	Xiong, Q., Griffin, W. L., Zheng, J.-P., O'Reilly, S. Y., Pearson, N. J., Xu, B., and Belousova, E. A., 2016, Southward trench migration at ∼130–120 Ma caused accretion of the Neo-Tethyan forearc lithosphere in Tibetan ophiolites: Earth and Planetary Science Letters, v. 438, p. 57–65, http:// doi:10.1016/j.epsl.2016.01.014
	Xu, D.M., Huang, G.C., and Li, Y.J., 2008, Sm-Nd ages and Nd-Sr-Pb isotope signatures of the Xiugugabu ophiolite, southwestern Tibet: Geology in China, v. 35, p. 429–435.
	Zhang, C., Liu, C.Z., Wu, F.Y., Zhang, L.L., and Ji, W.Q., 2016, Geochemistry and geochronology of mafic rocks from the Luobusa ophiolite, South Tibet: Lithos, v. 245, p. 93–108, http://doi: 10.1016/j.lithos.2015.06.031
	Zhang, C., Liu, C. Z., Xu, Y., Ji, W. B., Wang, J. M., Wu, F. Y., Liu, T., Zhang, Z.Y., Zhang, W.Q., 2019, Subduction re-initiation at dying ridge of Neo-Tethys: Insights from mafic and metamafic rocks in Lhaze ophiolitic melange, Yarlung-Tsangbo Suture Zone: Earth and Planetary Science Letters, v. 523, http:// doi:10.1016/j.epsl.2019.07.009
	Zhang, J. E., Xiao, W., Windley, B. F., Wakabayashi, J., Cai, F., Sein, K., Wu, H., Naing, S., 2018, Multiple alternating forearc- and backarc-ward migration of magmatism in the Indo-Myanmar Orogenic Belt since the Jurassic: Documentation of the orogenic architecture of eastern Neotethys in SE Asia: Earth-Science Reviews, v. 185, p, 704–731, http://doi:10.1016/j.earscirev.2018.07.009
	Zhang, J. E., Xiao, W. J., Windley, B., Cai, F. L., Sein, K., and Naing, S., 2017, Early Cretaceous wedge extrusion in the Indo-Burma Range accretionary complex: implications for the Mesozoic subduction of Neotethys in SE Asia: International Journal of Earth Sciences, v. 106, p.1391–1408, http://doi:10.1007/s00531-017-1468-7
	Zhang, L.L., Liu, C.Z., Wu, F.Y., and Zhang, C., 2014, Rock assemblage, geochronology and genesis of the Zedong ophiolite: Joint Academic Annual Conference of Chinese Earth Sciences, 1838 p.
	Zhang, W.P., Mo, X.X., Zhu, D.C., Yuan, S.H, and Wang, L.Q., 2011, Chronology and geochemistry on gabbro and basalt of the ophiolite mélange in Lang County, Tibet, China: Journal of Chengdu University of Technology (Science and Technology Edition), v. 38, p. 538–548.
